1 **Phosphorylation of the selective autophagy receptor TAX1BP1 by**  
2 **canonical and noncanonical I $\kappa$ B kinases promotes its lysosomal**  
3 **localization and clearance of MAVS aggregates**

4

5 Young Bong Choi<sup>a\*</sup>, Jiawen Zhang<sup>b</sup>, Mai Tram Vo<sup>a</sup>, Jesse White<sup>b</sup>, Chaoxia He<sup>a</sup> and Edward W.

6 Harhaj<sup>a, b\*</sup>

7

8 <sup>a</sup>Department of Oncology, Sidney Kimmel Comprehensive Cancer Center, Johns Hopkins School

9 of Medicine, Baltimore, MD 21287, USA

10 <sup>b</sup>Department of Microbiology and Immunology, Penn State College School of Medicine, Hershey,

11 PA 17033, USA

12

13

14 Running Title: Phosphorylation of TAX1BP1 regulates its autophagy function

15

16 \*To whom correspondence should be addressed: [ewh110@psu.edu](mailto:ewh110@psu.edu) or [ychoi15@jhmi.edu](mailto:ychoi15@jhmi.edu)

17

18 **Abstract**

19 TAX1BP1 is a selective autophagy receptor which inhibits NF- $\kappa$ B and RIG-I-like receptor (RLR)  
20 signaling to prevent excessive inflammation and maintain homeostasis. Selective autophagy  
21 receptors such as p62/SQSTM1 and OPTN are phosphorylated by the noncanonical I $\kappa$ B kinase  
22 TBK1 to stimulate their selective autophagy function. However, it is unknown if TAX1BP1 is  
23 regulated by TBK1 or other kinases under basal conditions or during RNA virus infection. Here,  
24 we found that the noncanonical I $\kappa$ B kinases TBK1 and IKKi phosphorylate TAX1BP1 to regulate  
25 its basal turnover, whereas the canonical I $\kappa$ B kinase IKK $\alpha$  and the core autophagy factor ATG9  
26 play essential roles in RNA virus-mediated TAX1BP1 autophagosomal degradation. TAX1BP1  
27 phosphorylation by canonical and noncanonical I $\kappa$ B kinases promotes its localization to lysosomes  
28 resulting in its degradation. Furthermore, TAX1BP1 plays a critical role in the clearance of MAVS  
29 aggregates, and phosphorylation of TAX1BP1 augments its MAVS aggregatephagy function.  
30 Together, our data support a model whereby I $\kappa$ B kinases license TAX1BP1 selective autophagy  
31 function to inhibit MAVS and RLR signaling.

32

33

## 34 **Author Summary**

35 The RIG-I-like receptor (RLR) pathway induces type I interferon (IFN) and proinflammatory  
36 cytokines in response to RNA virus infection. MAVS is a mitochondrial adaptor protein in the  
37 RLR pathway that forms prion-like aggregates upon activation; however, how MAVS aggregates  
38 are cleared to restore homeostasis is unclear. Autophagy is a lysosomal degradation pathway  
39 important for the clearance of potentially cytotoxic protein aggregates that could induce  
40 inflammation and/or cell death. TAX1BP1 is a selective autophagy receptor that inhibits RLR  
41 signaling, but the precise mechanisms remain unknown. Here, we found that TAX1BP1 is a  
42 substrate for multi-site phosphorylation by canonical and noncanonical I $\kappa$ B kinases which  
43 triggered its lysosomal localization and degradation. We also found that TAX1BP1 was critical  
44 for the clearance of MAVS aggregates in a phosphorylation-dependent manner. Overall, our data  
45 suggest that phosphorylation serves a key regulatory function for TAX1BP1 to inhibit RLR  
46 signaling.

## 47 **Introduction**

48 Pattern recognition receptors (PRRs) detect conserved molecular features of viruses and other  
49 pathogens known as PAMPs (pathogen-associated molecular patterns). In the RIG-I-like receptor  
50 (RLR) pathway the cytoplasmic RNA helicases RIG-I and MDA5 recognize nucleic acid derived  
51 from RNA viruses and trigger signaling pathways through the mitochondrial protein MAVS,  
52 leading to activation of NF- $\kappa$ B and IRF3 transcription factors that upregulate expression of  
53 proinflammatory cytokines and type I IFNs respectively [1, 2]. MAVS recruits E3 ubiquitin ligases  
54 such as TRAF2, TRAF3, TRAF5 and TRAF6 to conjugate lysine 63 (K63)-linked polyubiquitin  
55 chains that recruit the adaptor NEMO (also known as IKK $\gamma$ ) and noncanonical I $\kappa$ B kinases TBK1  
56 and IKKi (also known as IKK epsilon) [3-8]. TBK1 and IKKi directly phosphorylate IRF3 and  
57 IRF7 to trigger their dimerization, nuclear localization and activation of type I IFN to restrict virus  
58 replication [9, 10]. In addition, canonical IKK kinases IKK $\alpha$  and IKK $\beta$  phosphorylate the  
59 inhibitory protein I $\kappa$ B $\alpha$  to trigger its proteasomal degradation and release NF- $\kappa$ B dimers to  
60 activate proinflammatory genes [11].

61

62 Macroautophagy (hereafter referred to as autophagy) is an evolutionarily conserved lysosomal  
63 degradation pathway critical for homeostasis. Autophagy is initiated by the recruitment of  
64 membranes and the formation of a phagophore which elongates and forms double membrane  
65 vesicles termed autophagosomes which subsequently fuse with lysosomes to degrade the contents  
66 in autolysosomes [12, 13]. LC3-I is an ATG8 family member conjugated with  
67 phosphatidylethanolamine (PE) during autophagy to form LC3-II and plays key roles in the  
68 biogenesis and maturation of autophagosomes as well as cargo recruitment [14]. Selective  
69 autophagy results in the recruitment of specific cargo to autophagosomes including protein

70 aggregates/misfolded proteins (aggrephagy), damaged organelles such as mitochondria  
71 (mitophagy) or pathogenic microbes (xenophagy) [15]. Autophagy receptors provide specificity  
72 by recognizing and linking cargo to autophagosomes. Cargo destined for autophagosomes are  
73 typically modified by post-translational modifications (PTMs) such as ubiquitination which can  
74 be detected by autophagy receptors containing ubiquitin binding domains [16]. Furthermore,  
75 autophagy receptors harbor LC3 interaction regions (LIRs) that link cargo to autophagosomes [17].  
76 The best characterized selective autophagy receptors consist of the Sequestosome 1 (p62-  
77 SQSTM1)-like receptor family including p62, Optineurin (OPTN), NBR1, NDP52 and TAX1BP1  
78 [18]. Autophagy has been linked to the negative regulation of RLR signaling [19, 20], yet the  
79 precise mechanisms remain unknown.

80

81 TAX1BP1 was originally identified in yeast two-hybrid screens as a binding protein of the human  
82 T-cell leukemia virus 1 (HTLV-1) Tax protein, the ubiquitin-editing enzyme A20 (also known as  
83 TNFAIP3) and the E3 ubiquitin ligase TRAF6 [21-23]. TAX1BP1 inhibits canonical NF- $\kappa$ B  
84 signaling, together with E3 ligases Itch and RNF11, by acting as an adaptor for the ubiquitin-  
85 editing enzyme A20 [24-27]. In addition to regulating NF- $\kappa$ B signaling, TAX1BP1 also inhibits  
86 the RLR pathway and the induction of type I IFN triggered by RNA virus infection or transfection  
87 with the double-stranded RNA mimetic poly(I:C) [28]. Furthermore, TAX1BP1 blocks RLR-  
88 mediated apoptosis by interacting with and promoting MAVS degradation [29]. TAX1BP1 also  
89 suppresses the TLR3/4 pathways by targeting the adaptor TRIF for degradation [30, 31].  
90 TAX1BP1 contains two LIR motifs and functions as a selective autophagy receptor [32-34].  
91 Furthermore, the second zinc finger domain (ZnF2) in the carboxyl-terminus of TAX1BP1 can  
92 bind to K63-linked polyubiquitin chains [34, 35]. Therefore, TAX1BP1 targets ubiquitinated cargo

93 via ZnF2 and recruits cargo to developing autophagosomes via the LIR domains. TAX1BP1 also  
94 interacts with myosin VI, a cytoskeletal actin-based motor protein regulating vesicular transport,  
95 to induce autophagosome maturation [34]. Therefore, TAX1BP1 exerts multiple roles in  
96 autophagy including cargo selection and autophagosome maturation. TAX1BP1 can remove  
97 damaged mitochondria (mitophagy) together with OPTN and NDP52 [36], and pathogenic bacteria  
98 including *Salmonella Typhimurium* and *Mycobacterium tuberculosis* (xenophagy) [34, 37]. A  
99 recent study has linked TAX1BP1 to the clearance of protein aggregates (i.e., polyQ huntington  
100 fragments and TDP-43) in the brain thus implicating TAX1BP1 as an aggrephagy receptor [38].

101

102 Despite the important roles of TAX1BP1 in the inhibition of innate immune signaling pathways,  
103 it remains unclear how the selective autophagy function of TAX1BP1 is regulated and if  
104 TAX1BP1 functions as an aggrephagy receptor in the regulation of innate immunity. We  
105 previously reported that phosphorylation of TAX1BP1 by the kinase IKK $\alpha$  plays a critical role in  
106 the termination of TNF and IL-1 $\beta$ -induced NF- $\kappa$ B signaling [39]; however, it is unknown if  
107 phosphorylation of TAX1BP1 regulates its autophagy function. In this study, we have identified  
108 the noncanonical I $\kappa$ B kinases TBK1 and IKKi as regulators of TAX1BP1 basal autophagic  
109 degradation. However, during RNA virus infection, both TBK1 and IKKi are dispensable for  
110 TAX1BP1 degradation, whereas IKK $\alpha$  and the core autophagy factor ATG9 play critical roles in  
111 the inducible autophagic degradation of TAX1BP1. Furthermore, TAX1BP1 mediates the  
112 clearance of MAVS aggregates, both basally and during RNA virus infection, and phosphorylation  
113 of TAX1BP1 stimulates its MAVS aggrephagy function.

## 114 **Results**

### 115 **TAX1BP1 is phosphorylated by IKKi and TBK1 kinases**

116 We previously reported that the IKK $\alpha$  subunit of IKK phosphorylates TAX1BP1 to promote the  
117 termination of NF- $\kappa$ B signaling [39]. During the course of our studies on TAX1BP1 regulation of  
118 RLR signaling, we unexpectedly found that the noncanonical I $\kappa$ B kinases TBK1 and IKKi also  
119 phosphorylated TAX1BP1. Overexpression of IKK $\alpha$ , IKKi and TBK1 all induced a slower  
120 migrating form of TAX1BP1 (Fig 1A). Interestingly, IKKi (and to a lesser extent TBK1)  
121 overexpression was associated with the loss of TAX1BP1 protein (Fig 1A), likely due to its  
122 degradation. Treatment with lambda phosphatase converted the slower migrating form to a faster  
123 migrating form of TAX1BP1, thus confirming phosphorylation (Fig 1B). Furthermore, a kinase  
124 dead IKKi mutant K38A was impaired in TAX1BP1 phosphorylation (Fig S1). *In vitro* kinase  
125 assays with purified recombinant proteins demonstrated that TBK1 and IKKi could both directly  
126 phosphorylate TAX1BP1, although IKKi induced a more obvious TAX1BP1 band shift (Fig 1C).  
127 Bioinformatics analysis using NetPhos2.0 revealed two putative IKKi phosphorylation sites at  
128 Ser254 and Ser593 in TAX1BP1, similar to a site found in the deubiquitinase CYLD (Fig 1D)  
129 [40]. Interestingly, these two sites were also identified in our previous study on IKK $\alpha$ -induced  
130 TAX1BP1 phosphorylation in the context of NF- $\kappa$ B signaling [39]. To identify the IKKi-inducible  
131 TAX1BP1 phosphorylation sites in an unbiased manner, we used liquid chromatography coupled  
132 with tandem mass spectrometry (LC-MS/MS). As expected, IKKi induced a slower migrating band  
133 shift in TAX1BP1 (Fig 1E). A total of four bands were excised from the gel (both phosphorylated  
134 and unphosphorylated TAX1BP1 as controls) and subjected to LC-MS/MS analysis, which  
135 identified a total of 13 IKKi-inducible TAX1BP1 phosphorylation sites in TAX1BP1 (Fig 1F).

136

## 137 **Mapping of TAX1BP1 phosphorylation sites**

138 To validate the putative TAX1BP1 phosphorylation sites, we generated a panel of TAX1BP1 point  
139 mutants with all 13 putative sites mutated to alanine (designated as 13A) as well as the 10 sites  
140 (designated as 10A) downstream of coiled coil domain 1 (CC1) (Fig 2A). IKKi overexpression  
141 induced the phosphorylation of WT TAX1BP1, but not of 13A or 10A mutants (Fig 2B). Since the  
142 TAX1BP1 10A mutant was indistinguishable from 13A with regard to the lack of phosphorylation  
143 and degradation we focused on this mutant for subsequent experiments. We next generated a new  
144 panel of rescue mutants where each of the potential phosphorylation sites was individually restored  
145 back to the original amino acid in the context of TAX1BP1 10A (Fig 2C). These are designated as  
146 TAX1BP1 9A/WT amino acid. This panel of TAX1BP1 mutants was transfected into cells and  
147 then infected with an RNA virus, VSV-GFP (vesicular stomatitis virus (VSV) encoding a green  
148 fluorescence protein (GFP) reporter), followed by western blotting to assess phosphorylation. As  
149 expected, WT TAX1BP1 was phosphorylated and degraded upon VSV infection (Fig 2D).  
150 However, TAX1BP1 10A was resistant to VSV-induced phosphorylation and degradation (Fig  
151 2D). VSV-induced phosphorylation was observed with TAX1BP1 9A/T250, 9A/S254 and  
152 9A/S593, of which S254 and S593 are predicted IKKi phosphorylation sites. We also observed  
153 IKKi-induced phosphorylation of TAX1BP1 9A/S666 (Fig S2). Since virus-induced TAX1BP1  
154 degradation was not fully restored with single point mutations, we next generated a TAX1BP1  
155 compound mutant with S254, S593 and S666 in the context of 10A (designated as 7A; Fig 2C).  
156 An additional mutant was generated with T250, S254, S593 and S666 in the context of 10A  
157 (designated as 6A; Fig 2C). Remarkably, VSV-induced TAX1BP1 degradation was restored by  
158 the 7A and 6A mutants (Fig 2E) suggesting that S254, S593 and S666 (and possibly T250) act  
159 redundantly in promoting TAX1BP1 phosphorylation/degradation. We also introduced point



160 mutations in both canonical (W49A) and noncanonical (V143S) LC3 interaction motifs in  
161 TAX1BP1. Although IKKi-induced phosphorylation was not affected by the single and double  
162 TAX1BP1 LC3 binding mutants, the degradation of these mutants was impaired (Fig 2F). Thus,  
163 both TAX1BP1 phosphorylation and LC3 interaction motifs regulate its degradation.

164

### 165 **TBK1 and IKKi regulate the basal phosphorylation and turnover of TAX1BP1**

166 We hypothesized that virus infection-mediated phosphorylation and autophagic degradation of  
167 TAX1BP1 was mediated by IKKi. To test this notion, we generated IKKi knockout (KO) DLD-1  
168 cell lines using CRISPR/Cas9 technology. In addition, we generated DLD-1 cell lines deficient in  
169 the closely related kinase TBK1 due to their functional redundancy. DLD-1 cells were used  
170 because of high basal levels of TAX1BP1 expression [29]. DLD-1 cells were transduced with  
171 recombinant lentiviruses expressing Cas9 and either IKKi or TBK1 gRNAs followed by limiting  
172 dilution and clonal analysis of TBK1 and IKKi knockouts. Multiple clones of TBK1 and IKKi  
173 knockouts were identified and two clones each were selected for further experimentation.  
174 Surprisingly, poly(I:C)-induced TAX1BP1 degradation remained intact in TBK1 or IKKi KO cells  
175 (Fig 3A and 3B). To address the possibility of functional compensation between TBK1 and IKKi,  
176 we also generated TBK1/IKKi double knockout (TBK1/IKKi dKO) DLD-1 cells and infected  
177 these cells with VSV-GFP. Similarly, TAX1BP1 degradation was unimpaired in TBK1/IKKi dKO  
178 cells infected with VSV-GFP (Figs 3C and S3). Interestingly, VSV-induced p62/SQSTM1, but not  
179 NDP52, degradation was partially impaired in TBK1/IKKi dKO cells (Fig 3C). TAX1BP1  
180 degradation also remained intact in VSV-GFP-infected *Ikki*<sup>-/-</sup> and *Ikki*<sup>-/-</sup>*Tbk1*<sup>-/-</sup> MEFs (Fig 3D),  
181 thus ruling out cell-type specific effects. During the course of these studies, we noticed that basal  
182 expression of TAX1BP1 protein was increased in TBK1/IKKi dKO cells which was confirmed by

183 quantification in several independent experiments (Fig 3E). To provide further evidence that the  
184 basal phosphorylation of TAX1BP1 caused its degradation, we treated cells with the phosphatase  
185 inhibitor calyculin A. Indeed, calyculin A promoted TAX1BP1 degradation in WT DLD-1 cells,  
186 which was partially impaired in TBK1/IKKi dKO cells (Fig 3F). Therefore, it appears that dynamic  
187 regulation of TAX1BP1 phosphorylation and dephosphorylation controls its turnover.

188

### 189 **IKK $\alpha$ is required for virus-triggered degradation of TAX1BP1**

190 We previously reported that IKK $\alpha$  can directly phosphorylate TAX1BP1 to promote its NF- $\kappa$ B  
191 inhibitory function [39]. However, it remains unclear if IKK $\alpha$  plays a role in virus infection-  
192 induced autophagic degradation of TAX1BP1. Therefore, we first pretreated control and  
193 IKKi/TBK1 dKO DLD-1 cells with a small molecule IKK inhibitor (IKK inhibitor VII) which  
194 inhibits both IKK $\alpha$  (IC<sub>50</sub>=40 nM) and IKK $\beta$  (IC<sub>50</sub>=200 nM). Poly(I:C) induced the degradation of  
195 TAX1BP1 in vehicle-treated WT and IKKi/TBK1 dKO DLD-1 cells, but not in WT and  
196 IKKi/TBK1 dKO DLD-1 cells treated with IKK inhibitor VII (Fig 4A). To determine which IKK  
197 subunit was required for virus-induced TAX1BP1 degradation, WT, *Ikk $\alpha$ <sup>-/-</sup>*, *Ikk $\beta$ <sup>-/-</sup>* and *Ikk $\gamma$ <sup>-/-</sup>*  
198 MEFs were infected with VSV-GFP and TAX1BP1 expression was examined by western blotting.  
199 Interestingly, VSV-induced TAX1BP1 degradation was only impaired in *Ikk $\alpha$ <sup>-/-</sup>* MEFs (Fig 4B).  
200 Together, these data suggest that IKK $\alpha$  is required for virus-induced degradation of TAX1BP1.

201

### 202 **TAX1BP1 is degraded via autophagy during RNA virus infection**

203 In the latter stages of autophagy, selective autophagy receptors are degraded in autolysosomes  
204 together with their cargo, and are often used as markers for autophagic flux. Therefore, TAX1BP1

205 phosphorylation during virus infection likely stimulates its autophagy function, which then triggers  
206 its own degradation in autolysosomes. To confirm that TAX1BP1 degradation elicited by RNA  
207 virus infection was mediated by autophagy we first treated DLD-1 cells with either vehicle or  
208 bafilomycin A1 (Baf A1), a specific inhibitor of vacuolar-type H<sup>+</sup> ATPase (V-ATPase) that  
209 prevents the maturation of autophagic vacuoles. Although poly(I:C) triggered TAX1BP1  
210 degradation as expected, Baf A1 blocked poly(I:C)-induced TAX1BP1 degradation (Fig 5A).  
211 ATG3 functions as an E2-like enzyme in the conjugation of PE to LC3-I to yield LC3-II. We  
212 examined TAX1BP1 degradation in WT and *Atg3*<sup>-/-</sup> MEFs infected with VSV-GFP at a range of  
213 MOIs. TAX1BP1 degradation was induced by VSV-GFP in WT MEFs, which was largely  
214 impaired in *Atg3*<sup>-/-</sup> MEFs, however there was still an appreciable amount of TAX1BP1  
215 degradation suggesting potential degradation routes independent of LC3 lipidation (Fig 5B). As  
216 expected, virus infection induced the conversion of LC3-I to LC3-II in WT MEFs, but not in  
217 *Atg3*<sup>-/-</sup> MEFs (Fig 5B). However, VSV-GFP infection in *Atg3*<sup>-/-</sup> MEFs was comparable to WT  
218 MEFs as examined by Incucyte S3 live-cell analysis (Fig 5C). To further investigate the  
219 requirement of other autophagy components we used CRISPR/Cas9 to generate ATG9 and  
220 NCOA4 KO DLD-1 cell lines. ATG9 is a transmembrane protein required for autophagy that  
221 delivers membranes to expanding phagophores [41]. NCOA4 is a selective autophagy receptor and  
222 TAX1BP1 interacting protein that mediates the lysosomal degradation of ferritin to regulate iron  
223 homeostasis [42]. Degradation of TAX1BP1 was impaired in response to poly(I:C) transfection or  
224 VSV infection in clonal ATG9 KO cells (Fig 5D and 5E). However, NCOA4 deficiency had no  
225 effect on TAX1BP1 degradation (Fig 5D). Taken together, these data suggest that TAX1BP1  
226 degradation induced by RNA virus infection is mainly mediated by a classical autophagy pathway  
227 dependent on ATG9 and LC3 lipidation.

228

## 229 **TAX1BP1 phosphorylation promotes its lysosomal localization**

230 To determine how phosphorylation enhances TAX1BP1 autophagy function and degradation in  
231 autophagosomes, we first examined binding with ATG8 family members. TAX1BP1 could  
232 strongly interact with LC3A, LC3B, LC3C, GABARAP and GEC1, but weakly with GATE16  
233 (Fig S4). However, TAX1BP1 phosphorylation mutants (10A, 7A and 6A), as well as the S254D,  
234 S593D and S666D phosphomimetic 3SD (serines 254, 593 and 666 mutated to aspartic acid  
235 residues) all similarly interacted with LC3B, GEC1 and MAVS (Figs S5 and S6). To determine if  
236 TAX1BP1 phosphorylation regulated its dimerization, we performed NanoBiT assays (Promega)  
237 with WT TAX1BP1, phosphorylation mutant 10A and phosphomimetic 3SD. However, the 10A  
238 and 3SD mutants exhibited comparable dimerization to WT TAX1BP1 (Fig S7). Therefore,  
239 TAX1BP1 phosphorylation does not appear to regulate LC3 or MAVS binding, as well as its  
240 dimerization.

241

242 We next sought to determine if phosphorylation regulated the localization of TAX1BP1 to  
243 lysosomes. To this end, we examined the subcellular localization of WT TAX1BP1, the  
244 phosphorylation mutant 10A, and phosphomimetic 3SD in transfected *TAX1BP1* KO HeLa cells.  
245 Cells were treated with the protease inhibitor leupeptin to inhibit autophagic flux and prevent  
246 TAX1BP1 degradation by poly(I:C). WT TAX1BP1 colocalization with LAMP1, a marker of  
247 lysosomes, was significantly increased by poly(I:C) transfection (Fig 6A and 6B). However, the  
248 phosphorylation-deficient 10A mutant was impaired in poly(I:C)-mediated colocalization with  
249 lysosomes (Fig 6A and 6B). Remarkably, the TAX1BP1 phosphomimetic 3SD colocalized  
250 persistently with lysosomes, which was not further increased by poly(I:C) (Fig 6A and 6B). To

251 determine the role of I $\kappa$ B kinases in TAX1BP1 lysosomal targeting, we overexpressed IKK $\alpha$ ,  
252 IKK $\beta$  and IKKi with TAX1BP1 and stained for LAMP1. Overexpression of IKK $\alpha$  and IKKi, but  
253 not IKK $\beta$ , promoted TAX1BP1 colocalization with LAMP1 and lysosomes (Fig S8). Therefore,  
254 IKK $\alpha$ - and IKKi-mediated TAX1BP1 phosphorylation at serines 254, 593 and 666 directs its  
255 localization to lysosomes.

256

### 257 **TAX1BP1 clears MAVS aggregates in a phosphorylation-dependent manner**

258 Thus far our experiments have established that TAX1BP1 undergoes autophagic degradation  
259 during RNA virus infection, and this process is dependent on its phosphorylation. It remains  
260 unclear what cargo are recruited to autophagosomes by TAX1BP1 for the homeostatic control of  
261 the RLR pathway. We previously demonstrated that TAX1BP1 interacts with the mitochondrial  
262 adaptor MAVS, and targets MAVS for degradation [29]. Basal expression of MAVS protein is  
263 elevated in *TAX1BP1* KO cells and the half-life of MAVS is significantly increased in the absence  
264 of TAX1BP1 [29]. Dysregulated MAVS expression in *TAX1BP1* KO cells results in increased  
265 type I IFN and apoptosis in response to RNA virus infection [29]. Upon activation of RLR  
266 signaling MAVS forms large aggregates with properties of amyloid fibers and prions including:  
267 1) formation of fiber-like polymers, 2) ability to “infect” the endogenous protein and convert it to  
268 aggregate forms, 3) resistance to protease digestion and 4) resistance to detergent solubilization  
269 [43]. A common approach to analyze MAVS aggregates is SDD-AGE (semi-denaturing detergent  
270 agarose gel electrophoresis), which can detect large polymers between 200-4000 kDa [43, 44].  
271 Therefore, SDD-AGE was utilized to analyze MAVS aggregates in WT and *Tax1bp1*<sup>-/-</sup> MEFs  
272 infected with Sendai virus (SeV). In WT MEFs, SeV infection triggered the formation of MAVS  
273 aggregates as expected (Fig 7A). Remarkably, MAVS aggregates were spontaneously produced in

274 uninfected *Tax1bp1*<sup>-/-</sup> MEFs, at levels greater than WT MEFs infected with SeV (Fig 7A). SeV  
275 infection further increased MAVS aggregates in KO cells (Fig 7A). We next asked if  
276 overexpression of TAX1BP1 could clear MAVS aggregates, and if phosphorylation of TAX1BP1  
277 played a role in this function. Overexpression of MAVS yielded aggregates as detected by SDD-  
278 AGE; however, the phosphomimetic 3SD TAX1BP1 mutant but not the phosphorylation mutant  
279 10A inhibited MAVS aggregates (Fig 7B). Furthermore, the phosphomimetic 3SD TAX1BP1  
280 mutant was more effective than WT TAX1BP1 in suppressing MAVS-induced IFN activation (Fig  
281 7C). However, the TAX1BP1 phosphorylation mutant 10A was impaired in the inhibition of  
282 MAVS-IFN induction (Fig 7C).

283

## 284 **Discussion**

285 In this manuscript we have found that the selective autophagy receptor TAX1BP1 can be  
286 phosphorylated by noncanonical and canonical I $\kappa$ B kinases, with 13 putative IKKi-induced  
287 phosphorylation sites in TAX1BP1 identified by mass spectrometry analysis. TAX1BP1  
288 phosphorylation triggers its autophagosomal degradation with serines 254, 593 and 666 playing  
289 the most critical roles. Whereas IKKi and TBK1 regulate basal TAX1BP1 phosphorylation and  
290 degradation, IKK $\alpha$  is required for RNA virus-mediated TAX1BP1 autophagosomal degradation.  
291 Furthermore, the core autophagy factor ATG9 plays critical roles in both basal and virus-triggered  
292 TAX1BP1 degradation. Finally, we found that TAX1BP1 serves as a phosphorylation-dependent  
293 autophagy receptor for MAVS, and TAX1BP1-deficient cells exhibit a spontaneous  
294 accumulation of MAVS aggregates.

295

296 Phosphorylation plays important functional roles in the regulation of selective autophagy  
297 receptors. TBK1 phosphorylates OPTN, NDP52 and p62/SQSTM1 during bacterial infection and  
298 mitophagy to enhance Ub binding and cargo recruitment to autophagosomes [45-50]. Although  
299 TBK1 was shown to interact with TAX1BP1 in a previous study [51], it was not examined whether  
300 TBK1 played any role in TAX1BP1 autophagy function. Our data indicate that TBK1 and IKKi  
301 can phosphorylate TAX1BP1, but surprisingly both were dispensable for RNA virus-induced  
302 TAX1BP1 degradation (Fig 3). Instead, IKK $\alpha$  was required for TAX1BP1 degradation by RNA  
303 virus infection (Fig 4). In this regard, we previously found that IKK $\alpha$  interacts with TAX1BP1  
304 and phosphorylates TAX1BP1 on serines 593 and 666 for the inhibition of NF- $\kappa$ B signaling [39],  
305 however the effect of this phosphorylation on TAX1BP1 autophagy function was not examined in  
306 our previous study. TBK1 and IKKi share identical phosphorylation motifs which overlap with  
307 IKK $\alpha$  and IKK $\beta$  substrate specificities [52-54]. IKK phosphorylation sites usually have acidic or  
308 phosphorylated amino acids both amino-terminal and carboxyl-terminal to the phosphorylation  
309 site. Our bioinformatics and experimental approaches have identified S254 and S593 in TAX1BP1  
310 as phosphorylation sites for IKKi and IKK $\alpha$  (Fig 1) [39]. S666 does not conform to an IKK  
311 consensus site and thus may be phosphorylated by a kinase other than IKKi or IKK $\alpha$ . S254 and  
312 S593 are positioned immediately downstream of coiled-coil domains 1 and 3 respectively, which  
313 overlap with self-oligomerization regions of TAX1BP1 [23, 55]. However, TAX1BP1  
314 phosphorylation at S254 or S593 did not enhance its dimerization or binding to LC3 or MAVS  
315 (Figs S5-S7). Rather, IKK $\alpha$  and IKKi-mediated TAX1BP1 phosphorylation promotes its  
316 lysosomal localization (Figs 6 and S8), possibly due to conformational changes in TAX1BP1 that  
317 may facilitate its trafficking and/or binding to other factors needed for  
318 autophagosome/autolysosome targeting.

319

320 TAX1BP1 degradation during RNA virus infection or poly(I:C) transfection is inhibited by Baf  
321 A1 treatment or by genetic deletion of the core autophagy factor ATG9 (Fig 5), suggesting that  
322 TAX1BP1 degradation is mainly mediated by the classical autophagy pathway. However, we  
323 noticed there was not a complete block in virus-induced TAX1BP1 degradation in *Atg3<sup>-/-</sup>* MEFs  
324 (Fig 5B). These data indicate that a fraction of TAX1BP1 can still be degraded during virus  
325 infection in the absence of the LC3 lipidation machinery. Two recent studies have described  
326 lysosomal degradation pathways involving TAX1BP1 that are independent of ATG7 and LC3  
327 lipidation [42, 56]. Future studies should determine if TAX1BP1 is also degraded by these LC3-  
328 independent lysosomal targeting pathways during RNA virus infection.

329

330 MAVS forms large prion-like aggregates during RNA virus infection that propagate downstream  
331 signaling for the activation of TBK1 and IRF3, and type I IFN. However, it remains poorly  
332 understood how MAVS aggregates are resolved once viral infections are cleared to suppress  
333 inflammation and autoimmunity. Indeed, MAVS aggregates can be detected in peripheral blood  
334 mononuclear cells (PBMCs) of systemic lupus erythematosus (SLE) patients and are associated  
335 with increased levels of type I IFN [57]. The E3 ligase MARCH5 inhibits RNA virus-induced  
336 MAVS aggregates by ubiquitinating MAVS to trigger its proteasomal degradation [58]. The  
337 deubiquitinase YOD1 also antagonizes MAVS aggregation by cleaving K63-linked poly Ub chains  
338 on MAVS [59]. MAVS is also negatively regulated by autophagic degradation although the  
339 mechanisms remain poorly understood. The E3 ligases RNF34 and MARCH8 have been shown  
340 to ubiquitinate MAVS to promote NDP52-dependent autophagic degradation of MAVS [19, 20].  
341 Our results indicate that TAX1BP1 serves a nonredundant role in preventing the spontaneous



342 formation of MAVS aggregates and also inhibits MAVS aggregates formed during RNA virus  
343 infection (Fig 7). Therefore, we conclude that TAX1BP1 functions as an aggrephagy receptor for  
344 MAVS, which is congruent with a recent study that described TAX1BP1 as an aggrephagy  
345 receptor in the brain [38]. It remains to be determined if TAX1BP1 aggrephagy function extends  
346 to other innate immune signaling pathways in addition to the RLR pathway.

347

348 In summary, we describe a novel regulatory role for phosphorylation in the regulation of  
349 TAX1BP1 autophagosomal degradation and aggrephagy function. Since several viral proteins  
350 (e.g., HTLV-1 Tax [55], human papillomavirus E2 [60] and measles virus nucleoprotein [61])  
351 interact with TAX1BP1, it will be interesting in future studies to examine if viruses exploit  
352 TAX1BP1 phosphorylation to inhibit MAVS and RLR signaling.

## 354 **Materials and Methods**

### 355 **Cell culture**

356 Human embryonic kidney 293T (HEK293T) and DLD-1 cells were purchased from the American  
357 Type Culture Collection (ATCC). *TAX1BP1* knockout (KO) HeLa cells were provided by Dr.  
358 Richard Youle [36]. *Tax1bp1*<sup>-/-</sup> MEFs were described previously [24]. *Ikkα*<sup>-/-</sup>, *Ikkβ*<sup>-/-</sup> and *Ikkγ*<sup>-/-</sup>  
359 MEFs were provided by Dr. Michael Karin and described previously [39]. *Atg3*<sup>-/-</sup> [62], *Ikki*<sup>-/-</sup> [63]  
360 and *Ikki*<sup>-/-</sup>*Tbkl*<sup>-/-</sup> [64] MEFs were obtained from the indicated sources. Cell lines and MEFs were  
361 cultured in Dulbecco's Modified Eagle Medium (DMEM) supplemented with 10% fetal bovine  
362 serum, streptomycin and penicillin at 37°C and 5% CO<sub>2</sub>. The cell lines were tested for mycoplasma  
363 contamination using MycoAlert® Mycoplasma Detection kit (R&D Systems) and if necessary  
364 cultured in the presence of Plasmocin™ treatment or Plasmocin™ prophylactic (InvivoGen).  
365 Transient transfection with plasmids was performed using GenJet version II (SignaGen  
366 Laboratories), and transfection with poly(I:C) was performed using Lipofectamine 2000 reagent  
367 (Invitrogen) following the manufacturer's instructions.

368

### 369 **Virus infections**

370 Cells were starved for 1 h in serum-free DMEM and inoculated with VSV-GFP or SeV for 1 h at  
371 the indicated multiplicity of infection (MOI) in serum-free DMEM, and further incubated in  
372 complete DMEM for the indicated times.

373

### 374 **Immunological assays**

375 Antibodies used in immunological assays including immunoblotting, immunoprecipitation (IP),  
376 and indirect immunofluorescence (IFA) are listed in Supplemental Table 1. Cells were lysed in

377 RIPA buffer (50 mM Tris [pH 7.4], 150 mM NaCl, 1% Igepal CA-630, and 0.25% deoxycholate)  
378 containing a protease inhibitor cocktail and protein phosphatase inhibitors, including 10 mM NaF  
379 and 5 mM Na<sub>3</sub>VO<sub>4</sub>. For immunoblotting, cell lysates were separated on SDS-PAGE, transferred  
380 to nitrocellulose or polyvinylidene difluoride membranes, and immunoblotted with appropriate  
381 primary antibodies diluted in SuperBlock™ (PBS) blocking buffer (Thermo Fisher Scientific).  
382 Following incubation with horseradish peroxidase-labeled appropriate secondary antibody,  
383 immunoreactive bands were visualized by an enhanced chemiluminescence (ECL) reagent on an  
384 X-ray film. ImageJ software (NIH) was used to quantify the intensities of bands. For IP, total cell  
385 extracts were incubated with Flag (L5) or V5-antibody-conjugated beads overnight.  
386 Immunoprecipitants were washed with RIPA buffer, followed by elution of bound proteins with  
387 1x SDS sample buffer. For IFA, cells grown on a coverslip (and transfected) were fixed in Image-  
388 iT™ fixative (Thermo Fisher Scientific) and permeabilized in 0.5% Triton X-100 prepared in PBS.  
389 Following incubation with SuperBlock™ PBS blocking buffer for 1 h at room temperature,  
390 coverslips were incubated with primary antibodies, washed with PBS, and then incubated with  
391 appropriate fluorescent dye-conjugated secondary antibodies. Coverslips were mounted in  
392 ProLong™ Gold Antifade Mounting medium (Thermo Fisher Scientific) containing 4', 6-  
393 diamidino-2-phenylindole (DAPI) on glass slides and cells were imaged on a Zeiss 700 confocal  
394 laser scanning microscope with a 63x oil-immersion objective and Zen software. Pearson's  
395 correlation coefficient was calculated to measure co-localization between TAX1BP1 and LAMP1  
396 using Coloc2 (ImageJ).

397

398 **Nucleic acid manipulation**

399 All polymerase chain reaction (PCR) amplification and site-directed mutagenesis were performed  
400 using Platinum™ *Pfx* or SuperFi™ DNA polymerase (Thermo Fisher Scientific). Subcloning of  
401 open reading frames (ORFs) and their derivatives into expression plasmids was conducted using  
402 appropriate restriction enzyme sites (Supplemental Table 2). Small guide RNAs (gRNAs) for each  
403 gene were selected using Deskgen software, synthesized by Integrated DNA Technologies, and  
404 cloned into plentiCRISPR v2-puro [65] or plentiCRISPR v2-blasticidin (a gift from Mohan Babu,  
405 Addgene plasmid #83480) using BsmBI. Oligonucleotides are listed in Supplemental Table 3.

406

#### 407 **CRISPR/Cas9-mediated gene knockout**

408 CRISPR/Cas9-mediated genetic ablation of the indicated genes in DLD-1 cells was performed as  
409 previously described [66]. Antibiotic-resistant individual clones were isolated by limiting dilution  
410 and genomic DNA purified and subjected to Sanger DNA sequencing. TBK1 and IKKi gRNAs  
411 cloned in pLentiCRISPRv2 were kindly provided by Dr. Fangfang Zhou [67].

412

#### 413 ***In vitro* kinase and phosphatase assays**

414 Purified recombinant human TAX1BP1 protein (catalog # P01; Abnova) was incubated with  
415 purified GST-tagged IKKi (catalog # PV4875; Thermo Fisher Scientific) in buffer A containing  
416 20 mM Tris [pH 7.5], 10 mM MgCl<sub>2</sub>, 1 mM EGTA, 1 mM Na<sub>3</sub>VO<sub>4</sub>, 5 mM β-glycerophosphate, 2  
417 mM DTT, 0.02% Triton X-100 and 200 μM ATP for 10 min at 30°C or with purified hexahistidine-  
418 tagged TBK1 (catalog # PV3504; Thermo Fisher Scientific) in buffer B containing 50 mM Tris  
419 [pH 7.5], 10 mM MgCl<sub>2</sub>, 2 mM DTT, 0.025% Triton X-100 and 200 μM ATP for 20 min at 30°C.  
420 The reaction was terminated by boiling in 1x SDS-sample buffer for 5 min. For dephosphorylation

421 of TAX1BP1, lysates from 293T transfected cells were incubated with 800U  $\lambda$ -phosphatase at  
422 30°C for 30 min and then subjected to SDS-PAGE analysis.

423

#### 424 **Mass spectrometry (MS) analysis**

425 Coomassie stained gel pieces were de-stained and subjected to reduction (5 mM DTT for 45 min  
426 at 60°C) and alkylation (20 mM iodoacetamide for 20 min at room temperature in the dark).

427 Samples were subsequently proteolyzed with 10 ng trypsin (Promega)/ $\mu$ l overnight at 37°C. Dry

428 extracted peptides after clean-up were re-suspended in 8  $\mu$ l 0.1% formic acid. Titanium dioxide

429 was used for phosphopeptide enrichment. Protein identification by liquid chromatography

430 tandem mass spectrometry (LC-MS/MS) analysis of peptides was performed using an LTQ

431 Orbitrap Velos MS (Thermo Fisher Scientific) interfaced with a nanoAcquity LC system (Waters,

432 Corp.). Peptides were fractionated by reverse-phase HPLC on a 75  $\mu$ m x 15 cm PicoFrit column

433 with a 15  $\mu$ m emitter (New Objective) in-house packed with Magic C18AQ (Michrom

434 BioResources, Inc.) using 0-60% acetonitrile/0.1% formic acid gradient over 70 min at 300 nl/min.

435 Eluting peptides were sprayed directly into an LTQ Orbitrap Velos at 2.0 kV. Survey scans were

436 acquired from 350-1,800 m/z with up to 10 peptide masses individually isolated with a 1.9 Da

437 window and fragmented (MS/MS) using a collision energy of 40 and 30s dynamic exclusion.

438 Precursor and the fragment ions were analyzed at 30,000 and 7500 resolution, respectively.

439 Peptide sequences were identified from isotopically resolved masses in MS and MS/MS spectra

440 extracted with and without deconvolution using Thermo Scientific MS2 processor and Xtract

441 software. Data was searched for in the human RefSeq database, with oxidation on methionine

442 (variable), deamidation NQ (variable), phosphoSTY (variable) and carbamidomethyl on cysteine

443 as (fixed) modifications, using Proteome Discoverer 1.3 software.

444

#### 445 **Semi-denaturing detergent agarose gel electrophoresis (SDD-AGE)**

446 SDD-AGE was performed as previously performed [68]. Briefly, crude mitochondria isolated by  
447 differential centrifugation were resuspended in 1x sample buffer (0.5x Tris-borate-EDTA [TBE],  
448 10% glycerol, 2% SDS, and 0.0025% bromophenol blue) and loaded onto a 1.5% agarose gel.  
449 After electrophoresis in the running buffer (1x TBE and 0.1% SDS) for 1 h with a constant voltage  
450 of 100 V at 4°C, proteins were transferred to a nitrocellulose membrane for immunoblotting. SDD-  
451 AGE with transfected MAVS and TAX1BP1 was performed similarly but with whole cell lysates.

452

#### 453 **Live-cell imaging**

454 A total of  $5 \times 10^4$  WT or *Atg3*<sup>-/-</sup> MEFs were infected with VSV-GFP (MOI=0.1) and live-cell  
455 imaging was performed with an Incucyte S3 Live-Cell Analysis System (Essen BioScience).  
456 Images were acquired every two hours using phase contrast and green channels with a 10x  
457 objective in triplicate. GFP fluorescence was quantified as green object count per image  
458 normalized to phase area confluence.

459

#### 460 **Dual luciferase reporter assays**

461 Cells were transfected with the desired plasmids together with IFN $\beta$ -Luc and the *Renilla* reporter  
462 pTK-RLuc as an internal control. After 24 h, cells were lysed in passive lysis buffer (Promega)  
463 and subjected to dual-luciferase assays as recommended by the manufacturer (Promega).  
464 Luminescence was measured using a GloMax luminometer (Promega). Results are presented as  
465 the relative firefly luciferase activity over the *Renilla* luciferase activity.

466

467 **NanoBiT assays**

468 NanoBiT assays were performed as described by the manufacturer (Promega). Briefly, 293T cells  
469 were seeded in a 6-well plate and transfected with pairs of NanoBiT constructs. After 24 h, cells  
470 were collected, washed two times in PBS [pH 7.4], and resuspended in 1 ml of Opti-MEM I  
471 Reduced Serum Media (Thermo Fisher Scientific). 100  $\mu$ l of cell suspension was transferred to a  
472 white-walled 96-well plate in triplicate, and 20  $\mu$ l of Nano-Glo® Luciferase substrate furimazine  
473 (Promega) diluted in PBS at a ratio of 1:100 was added to each well. After incubation for 5 min at  
474 room temperature, luminescence was measured by a GloMax luminometer (Promega).

475

476 **Reagents**

477 Poly(I:C), Bafilomycin A1, IKK inhibitor VII, and leupeptin were purchased from  
478 MilliporeSigma.  $\lambda$ -phosphatase was from New England Biolabs. Calyculin A was from Cell  
479 Signaling. SeV was purchased from Charles River Laboratories.

480

481 **Statistical analysis**

482 Data are presented as mean  $\pm$  standard deviation from a representative experiment with triplicate  
483 samples. Statistical analysis was performed in GraphPad Prism 8 and indicated in the Figure  
484 legends.

485 **Acknowledgements**

486 We thank Drs. Hong-Gang Wang and Victor Jin for *Atg3*<sup>-/-</sup> MEFs, Dr. Tom Maniatis for *Ikk1*<sup>-/-</sup>  
487 MEFs, Drs. Thomas Decker and Shizuo Akira for *Ikk1*<sup>-/-</sup>*Tbk1*<sup>-/-</sup> MEFs, Dr. Michael Karin for  
488 *Ikkα*<sup>-/-</sup>, *Ikkβ*<sup>-/-</sup> and *Ikkγ*<sup>-/-</sup> MEFs, Dr. Richard Youle for *TAX1BP1* KO HeLa cells, Dr. Fangfang  
489 Zhou for TBK1 and IKKi CRISPR/Cas9 plasmids and Dr. Siddharth Balachandran for VSV-GFP.



## 490 References

- 491 1. Hornung V, Ellegast J, Kim S, Brzozka K, Jung A, Kato H, et al. 5'-Triphosphate RNA is  
492 the ligand for RIG-I. *Science*. 2006;314(5801):994-7. PubMed PMID: 17038590.
- 493 2. Kato H, Takeuchi O, Sato S, Yoneyama M, Yamamoto M, Matsui K, et al. Differential  
494 roles of MDA5 and RIG-I helicases in the recognition of RNA viruses. *Nature*.  
495 2006;441(7089):101-5. PubMed PMID: 16625202.
- 496 3. Kawai T, Takahashi K, Sato S, Coban C, Kumar H, Kato H, et al. IPS-1, an adaptor  
497 triggering RIG-I- and Mda5-mediated type I interferon induction. *Nat Immunol*. 2005;6(10):981-  
498 8. PubMed PMID: 16127453.
- 499 4. Seth RB, Sun L, Ea CK, Chen ZJ. Identification and characterization of MAVS, a  
500 mitochondrial antiviral signaling protein that activates NF-kappaB and IRF 3. *Cell*.  
501 2005;122(5):669-82. PubMed PMID: 16125763.
- 502 5. Oganessian G, Saha SK, Guo B, He JQ, Shahangian A, Zarnegar B, et al. Critical role of  
503 TRAF3 in the Toll-like receptor-dependent and -independent antiviral response. *Nature*.  
504 2006;439(7073):208-11. PubMed PMID: 16306936.
- 505 6. Zhao T, Yang L, Sun Q, Arguello M, Ballard DW, Hiscott J, et al. The NEMO adaptor  
506 bridges the nuclear factor-kappaB and interferon regulatory factor signaling pathways. *Nat*  
507 *Immunol*. 2007;8(6):592-600. PubMed PMID: 17468758.
- 508 7. Guo B, Cheng G. Modulation of the interferon antiviral response by the TBK1/IKK  
509 adaptor protein TANK. *J Biol Chem*. 2007;282(16):11817-26. Epub 2007/03/01. doi:  
510 10.1074/jbc.M700017200. PubMed PMID: 17327220.
- 511 8. Liu S, Chen J, Cai X, Wu J, Chen X, Wu YT, et al. MAVS recruits multiple ubiquitin E3  
512 ligases to activate antiviral signaling cascades. *eLife*. 2013;2:e00785. Epub 2013/08/21. doi:  
513 10.7554/eLife.00785. PubMed PMID: 23951545; PubMed Central PMCID: PMC3743401.
- 514 9. Fitzgerald KA, McWhirter SM, Faia KL, Rowe DC, Latz E, Golenbock DT, et al.  
515 IKKepsilon and TBK1 are essential components of the IRF3 signaling pathway. *Nat Immunol*.  
516 2003;4(5):491-6. Epub 2003/04/15. doi: 10.1038/ni921 ni921 [pii]. PubMed PMID: 12692549.
- 517 10. Sharma S, tenOever BR, Grandvaux N, Zhou GP, Lin R, Hiscott J. Triggering the  
518 interferon antiviral response through an IKK-related pathway. *Science*. 2003;300(5622):1148-51.  
519 Epub 2003/04/19. doi: 10.1126/science.1081315 1081315 [pii]. PubMed PMID: 12702806.
- 520 11. Ramos HJ, Gale M, Jr. RIG-I like receptors and their signaling crosstalk in the regulation  
521 of antiviral immunity. *Curr Opin Virol*. 2011;1(3):167-76. Epub 2011/09/29. doi:  
522 10.1016/j.coviro.2011.04.004. PubMed PMID: 21949557; PubMed Central PMCID:  
523 PMC3177754.
- 524 12. Dikic I, Elazar Z. Mechanism and medical implications of mammalian autophagy. *Nat Rev*  
525 *Mol Cell Biol*. 2018;19(6):349-64. Epub 2018/04/06. doi: 10.1038/s41580-018-0003-4. PubMed  
526 PMID: 29618831.
- 527 13. Levine B, Kroemer G. Biological Functions of Autophagy Genes: A Disease Perspective.  
528 *Cell*. 2019;176(1-2):11-42. Epub 2019/01/12. doi: 10.1016/j.cell.2018.09.048. PubMed PMID:  
529 30633901; PubMed Central PMCID: PMC6347410.
- 530 14. Fujita N, Itoh T, Omori H, Fukuda M, Noda T, Yoshimori T. The Atg16L complex  
531 specifies the site of LC3 lipidation for membrane biogenesis in autophagy. *Mol Biol Cell*.  
532 2008;19(5):2092-100. Epub 2008/03/07. doi: 10.1091/mbc.E07-12-1257. PubMed PMID:  
533 18321988; PubMed Central PMCID: PMC366860.

- 534 15. Marshall RS, Vierstra RD. Autophagy: The Master of Bulk and Selective Recycling. *Annu*  
535 *Rev Plant Biol.* 2018;69:173-208. Epub 2018/03/15. doi: 10.1146/annurev-arplant-042817-  
536 040606. PubMed PMID: 29539270.
- 537 16. Grumati P, Dikic I. Ubiquitin signaling and autophagy. *J Biol Chem.* 2018;293(15):5404-  
538 13. Epub 2017/12/01. doi: 10.1074/jbc.TM117.000117. PubMed PMID: 29187595; PubMed  
539 Central PMCID: PMC5900779.
- 540 17. Johansen T, Lamark T. Selective Autophagy: ATG8 Family Proteins, LIR Motifs and  
541 Cargo Receptors. *J Mol Biol.* 2020;432(1):80-103. Epub 2019/07/17. doi:  
542 10.1016/j.jmb.2019.07.016. PubMed PMID: 31310766.
- 543 18. Lamark T, Svenning S, Johansen T. Regulation of selective autophagy: the p62/SQSTM1  
544 paradigm. *Essays Biochem.* 2017;61(6):609-24. Epub 2017/12/14. doi: 10.1042/EBC20170035.  
545 PubMed PMID: 29233872.
- 546 19. Jin S, Tian S, Luo M, Xie W, Liu T, Duan T, et al. Tetherin Suppresses Type I Interferon  
547 Signaling by Targeting MAVS for NDP52-Mediated Selective Autophagic Degradation in Human  
548 Cells. *Mol Cell.* 2017;68(2):308-22 e4. Epub 2017/10/03. doi: 10.1016/j.molcel.2017.09.005.  
549 PubMed PMID: 28965816.
- 550 20. He X, Zhu Y, Zhang Y, Geng Y, Gong J, Geng J, et al. RNF34 functions in immunity and  
551 selective mitophagy by targeting MAVS for autophagic degradation. *EMBO J.*  
552 2019;38(14):e100978. Epub 2019/07/16. doi: 10.15252/embj.2018100978. PubMed PMID:  
553 31304625; PubMed Central PMCID: PMC6627233.
- 554 21. Gachon F, Peleraux A, Thebault S, Dick J, Lemasson I, Devaux C, et al. CREB-2, a cellular  
555 CRE-dependent transcription repressor, functions in association with Tax as an activator of the  
556 human T-cell leukemia virus type 1 promoter. *J Virol.* 1998;72(10):8332-7. PubMed PMID:  
557 9733879.
- 558 22. De Valck D, Jin DY, Heyninck K, Van de Craen M, Contreras R, Fiers W, et al. The zinc  
559 finger protein A20 interacts with a novel anti-apoptotic protein which is cleaved by specific  
560 caspases. *Oncogene.* 1999;18(29):4182-90. PubMed PMID: 10435631.
- 561 23. Ling L, Goeddel DV. T6BP, a TRAF6-interacting protein involved in IL-1 signaling. *Proc*  
562 *Natl Acad Sci U S A.* 2000;97(17):9567-72. PubMed PMID: 10920205.
- 563 24. Shembade N, Harhaj NS, Liebl DJ, Harhaj EW. Essential role for TAX1BP1 in the  
564 termination of TNF-alpha-, IL-1- and LPS-mediated NF-kappaB and JNK signaling. *EMBO J.*  
565 2007;26(17):3910-22. PubMed PMID: 17703191.
- 566 25. Harhaj EW, Dixit VM. Regulation of NF-kappaB by deubiquitinases. *Immunol Rev.*  
567 2012;246(1):107-24. Epub 2012/03/23. doi: 10.1111/j.1600-065X.2012.01100.x. PubMed PMID:  
568 22435550.
- 569 26. Shembade N, Harhaj NS, Parvatiyar K, Copeland NG, Jenkins NA, Matesic LE, et al. The  
570 E3 ligase Itch negatively regulates inflammatory signaling pathways by controlling the function  
571 of the ubiquitin-editing enzyme A20. *Nat Immunol.* 2008;9(3):254-62. PubMed PMID: 18246070.
- 572 27. Shembade N, Parvatiyar K, Harhaj NS, Harhaj EW. The ubiquitin-editing enzyme A20  
573 requires RNF11 to downregulate NF-kappaB signalling. *EMBO J.* 2009;28(5):513-22. Epub  
574 2009/01/10. doi: emboj2008285 [pii] 10.1038/emboj.2008.285. PubMed PMID: 19131965.
- 575 28. Parvatiyar K, Barber GN, Harhaj EW. TAX1BP1 and A20 inhibit antiviral signaling by  
576 targeting TBK1-IKKi kinases. *J Biol Chem.* 2010;285(20):14999-5009. Epub 2010/03/23. doi:  
577 10.1074/jbc.M110.109819. PubMed PMID: 20304918; PubMed Central PMCID: PMC2865285.
- 578 29. Choi YB, Shembade N, Parvatiyar K, Balachandran S, Harhaj EW. TAX1BP1 Restrains  
579 Virus-Induced Apoptosis by Facilitating Itch-Mediated Degradation of the Mitochondrial Adaptor

- 580 MAVS. *Mol Cell Biol.* 2017;37(1). doi: 10.1128/MCB.00422-16. PubMed PMID: 27736772;  
581 PubMed Central PMCID: PMC5192085.
- 582 30. Yang Q, Liu TT, Lin H, Zhang M, Wei J, Luo WW, et al. TRIM32-TAX1BP1-dependent  
583 selective autophagic degradation of TRIF negatively regulates TLR3/4-mediated innate immune  
584 responses. *PLoS Pathog.* 2017;13(9):e1006600. Epub 2017/09/13. doi:  
585 10.1371/journal.ppat.1006600. PubMed PMID: 28898289; PubMed Central PMCID:  
586 PMC5595311.
- 587 31. Samie M, Lim J, Verschueren E, Baughman JM, Peng I, Wong A, et al. Selective  
588 autophagy of the adaptor TRIF regulates innate inflammatory signaling. *Nat Immunol.*  
589 2018;19(3):246-54. Epub 2018/01/24. doi: 10.1038/s41590-017-0042-6. PubMed PMID:  
590 29358708.
- 591 32. Newman AC, Scholefield CL, Kemp AJ, Newman M, McIver EG, Kamal A, et al. TBK1  
592 kinase addiction in lung cancer cells is mediated via autophagy of Tax1bp1/Ndp52 and non-  
593 canonical NF-kappaB signalling. *PLoS ONE.* 2012;7(11):e50672. Epub 2012/12/05. doi:  
594 10.1371/journal.pone.0050672. PubMed PMID: 23209807; PubMed Central PMCID:  
595 PMC3510188.
- 596 33. Tumbarello DA, Waxse BJ, Arden SD, Bright NA, Kendrick-Jones J, Buss F. Autophagy  
597 receptors link myosin VI to autophagosomes to mediate Tom1-dependent autophagosome  
598 maturation and fusion with the lysosome. *Nat Cell Biol.* 2012;14(10):1024-35. Epub 2012/10/02.  
599 doi: 10.1038/ncb2589. PubMed PMID: 23023224; PubMed Central PMCID: PMC3472162.
- 600 34. Tumbarello DA, Manna PT, Allen M, Bycroft M, Arden SD, Kendrick-Jones J, et al. The  
601 Autophagy Receptor TAX1BP1 and the Molecular Motor Myosin VI Are Required for Clearance  
602 of Salmonella Typhimurium by Autophagy. *PLoS Pathog.* 2015;11(10):e1005174. doi:  
603 10.1371/journal.ppat.1005174. PubMed PMID: 26451915; PubMed Central PMCID:  
604 PMC3459966.
- 605 35. Iha H, Peloponese JM, Verstrepen L, Zapart G, Ikeda F, Smith CD, et al. Inflammatory  
606 cardiac valvulitis in TAX1BP1-deficient mice through selective NF-kappaB activation. *EMBO J.*  
607 2008;27(4):629-41. PubMed PMID: 18239685.
- 608 36. Lazarou M, Sliter DA, Kane LA, Sarraf SA, Wang C, Burman JL, et al. The ubiquitin  
609 kinase PINK1 recruits autophagy receptors to induce mitophagy. *Nature.* 2015;524(7565):309-14.  
610 doi: 10.1038/nature14893. PubMed PMID: 26266977.
- 611 37. Budzik JM, Swaney DL, Jimenez-Morales D, Johnson JR, Garelis NE, Repasy T, et al.  
612 Dynamic post-translational modification profiling of Mycobacterium tuberculosis-infected  
613 primary macrophages. *eLife.* 2020;9. Epub 2020/01/18. doi: 10.7554/eLife.51461. PubMed  
614 PMID: 31951200; PubMed Central PMCID: PMC7030789.
- 615 38. Sarraf SA, Shah HV, Kanfer G, Pickrell AM, Holtzclaw LA, Ward ME, et al. Loss of  
616 TAX1BP1-Directed Autophagy Results in Protein Aggregate Accumulation in the Brain. *Mol*  
617 *Cell.* 2020;80(5):779-95 e10. Epub 2020/11/19. doi: 10.1016/j.molcel.2020.10.041. PubMed  
618 PMID: 33207181.
- 619 39. Shembade N, Pujari R, Harhaj NS, Abbott DW, Harhaj EW. The kinase IKKalpha inhibits  
620 activation of the transcription factor NF-kappaB by phosphorylating the regulatory molecule  
621 TAX1BP1. *Nat Immunol.* 2011;12(9):834-43. Epub 2011/07/19. doi: 10.1038/ni.2066. PubMed  
622 PMID: 21765415; PubMed Central PMCID: PMC3205447.
- 623 40. Hutti JE, Shen RR, Abbott DW, Zhou AY, Sprott KM, Asara JM, et al. Phosphorylation  
624 of the tumor suppressor CYLD by the breast cancer oncogene IKKepsilon promotes cell  
625 transformation. *Mol Cell.* 2009;34(4):461-72. Epub 2009/06/02. doi: S1097-2765(09)00313-X

- 626 [pii] 10.1016/j.molcel.2009.04.031. PubMed PMID: 19481526; PubMed Central PMCID:  
627 PMC2746958.
- 628 41. Yamamoto H, Kakuta S, Watanabe TM, Kitamura A, Sekito T, Kondo-Kakuta C, et al.  
629 Atg9 vesicles are an important membrane source during early steps of autophagosome formation.  
630 *Journal of Cell Biology*. 2012;198(2):219-33. doi: 10.1083/jcb.201202061. PubMed PMID:  
631 WOS:000306686100010.
- 632 42. Goodwin JM, Dowdle WE, DeJesus R, Wang Z, Bergman P, Kobylarz M, et al.  
633 Autophagy-Independent Lysosomal Targeting Regulated by ULK1/2-FIP200 and ATG9. *Cell*  
634 *Rep*. 2017;20(10):2341-56. Epub 2017/09/07. doi: 10.1016/j.celrep.2017.08.034. PubMed PMID:  
635 28877469; PubMed Central PMCID: PMC5699710.
- 636 43. Hou F, Sun L, Zheng H, Skaug B, Jiang QX, Chen ZJ. MAVS forms functional prion-like  
637 aggregates to activate and propagate antiviral innate immune response. *Cell*. 2011;146(3):448-61.  
638 Epub 2011/07/26. doi: 10.1016/j.cell.2011.06.041. PubMed PMID: 21782231; PubMed Central  
639 PMCID: PMC3179916.
- 640 44. Zamorano Cuervo N, Osseman Q, Grandvaux N. Virus Infection Triggers MAVS  
641 Polymers of Distinct Molecular Weight. *Viruses*. 2018;10(2). Epub 2018/02/02. doi:  
642 10.3390/v10020056. PubMed PMID: 29385716; PubMed Central PMCID: PMC5850363.
- 643 45. Thurston TL, Ryzhakov G, Bloor S, von Muhlinen N, Randow F. The TBK1 adaptor and  
644 autophagy receptor NDP52 restricts the proliferation of ubiquitin-coated bacteria. *Nat Immunol*.  
645 2009;10(11):1215-21. Epub 2009/10/13. doi: 10.1038/ni.1800. PubMed PMID: 19820708.
- 646 46. Wild P, Farhan H, McEwan DG, Wagner S, Rogov VV, Brady NR, et al. Phosphorylation  
647 of the autophagy receptor optineurin restricts *Salmonella* growth. *Science*. 2011;333(6039):228-  
648 33. Epub 2011/05/28. doi: 10.1126/science.1205405. PubMed PMID: 21617041; PubMed Central  
649 PMCID: PMC3714538.
- 650 47. Richter B, Sliter DA, Herhaus L, Stolz A, Wang C, Beli P, et al. Phosphorylation of OPTN  
651 by TBK1 enhances its binding to Ub chains and promotes selective autophagy of damaged  
652 mitochondria. *Proc Natl Acad Sci U S A*. 2016;113(15):4039-44. doi: 10.1073/pnas.1523926113.  
653 PubMed PMID: 27035970; PubMed Central PMCID: PMC4839414.
- 654 48. Matsumoto G, Wada K, Okuno M, Kurosawa M, Nukina N. Serine 403 phosphorylation  
655 of p62/SQSTM1 regulates selective autophagic clearance of ubiquitinated proteins. *Mol Cell*.  
656 2011;44(2):279-89. Epub 2011/10/25. doi: 10.1016/j.molcel.2011.07.039. PubMed PMID:  
657 22017874.
- 658 49. Pilli M, Arko-Mensah J, Ponpuak M, Roberts E, Master S, Mandell MA, et al. TBK-1  
659 promotes autophagy-mediated antimicrobial defense by controlling autophagosome maturation.  
660 *Immunity*. 2012;37(2):223-34. Epub 2012/08/28. doi: 10.1016/j.immuni.2012.04.015. PubMed  
661 PMID: 22921120; PubMed Central PMCID: PMC3428731.
- 662 50. Heo JM, Ordureau A, Paulo JA, Rinehart J, Harper JW. The PINK1-PARKIN  
663 Mitochondrial Ubiquitylation Pathway Drives a Program of OPTN/NDP52 Recruitment and  
664 TBK1 Activation to Promote Mitophagy. *Mol Cell*. 2015;60(1):7-20. Epub 2015/09/15. doi:  
665 10.1016/j.molcel.2015.08.016. PubMed PMID: 26365381; PubMed Central PMCID:  
666 PMC4592482.
- 667 51. Fu T, Liu J, Wang Y, Xie X, Hu S, Pan L. Mechanistic insights into the interactions of  
668 NAP1 with the SKICH domains of NDP52 and TAX1BP1. *Proc Natl Acad Sci U S A*.  
669 2018;115(50):E11651-E60. Epub 2018/11/22. doi: 10.1073/pnas.1811421115. PubMed PMID:  
670 30459273; PubMed Central PMCID: PMC6294882.

- 671 52. Huttu JE, Turk BE, Asara JM, Ma A, Cantley LC, Abbott DW. I $\kappa$ B Kinase  $\beta$   
672 Phosphorylates the K63 Deubiquitinase A20 To Cause Feedback Inhibition of the NF- $\kappa$ B  
673 Pathway. *Mol Cell Biol*. 2007;27(21):7451-61. PubMed PMID: 17709380.
- 674 53. Huttu JE, Porter MA, Cheely AW, Cantley LC, Wang X, Kireev D, et al. Development of  
675 a high-throughput assay for identifying inhibitors of TBK1 and IKK $\epsilon$ . *PLoS One*.  
676 2012;7(7):e41494. Epub 2012/08/04. doi: 10.1371/journal.pone.0041494. PubMed PMID:  
677 22859992; PubMed Central PMCID: PMC3408500.
- 678 54. Marinis JM, Huttu JE, Homer CR, Cobb BA, Cantley LC, McDonald C, et al. I $\kappa$ B  
679 kinase  $\alpha$  phosphorylation of TRAF4 downregulates innate immune signaling. *Mol Cell Biol*.  
680 2012;32(13):2479-89. Epub 2012/05/02. doi: 10.1128/MCB.00106-12. PubMed PMID:  
681 22547678; PubMed Central PMCID: PMC3434482.
- 682 55. Chin KT, Chun AC, Ching YP, Jeang KT, Jin DY. Human T-Cell Leukemia Virus  
683 Oncoprotein Tax Represses Nuclear Receptor-Dependent Transcription by Targeting Coactivator  
684 TAX1BP1. *Cancer Res*. 2007;67(3):1072-81. PubMed PMID: 17283140.
- 685 56. Ohnstad AE, Delgado JM, North BJ, Nasa I, Kettenbach AN, Schultz SW, et al. Receptor-  
686 mediated clustering of FIP200 bypasses the role of LC3 lipidation in autophagy. *EMBO J*.  
687 2020:e104948. Epub 2020/11/24. doi: 10.15252/embj.2020104948. PubMed PMID: 33226137;  
688 PubMed Central PMCID: PMC7737610.
- 689 57. Shao WH, Shu DH, Zhen Y, Hilliard B, Priest SO, Cesaroni M, et al. Prion-like  
690 Aggregation of Mitochondrial Antiviral Signaling Protein in Lupus Patients Is Associated With  
691 Increased Levels of Type I Interferon. *Arthritis Rheumatol*. 2016;68(11):2697-707. Epub  
692 2016/10/28. doi: 10.1002/art.39733. PubMed PMID: 27110677; PubMed Central PMCID:  
693 PMC5079845.
- 694 58. Yoo YS, Park YY, Kim JH, Cho H, Kim SH, Lee HS, et al. The mitochondrial ubiquitin  
695 ligase MARCH5 resolves MAVS aggregates during antiviral signalling. *Nature communications*.  
696 2015;6:7910. doi: 10.1038/ncomms8910. PubMed PMID: 26246171; PubMed Central PMCID:  
697 PMC4918326.
- 698 59. Liu C, Huang S, Wang X, Wen M, Zheng J, Wang W, et al. The Otubain YOD1 Suppresses  
699 Aggregation and Activation of the Signaling Adaptor MAVS through Lys63-Linked  
700 Deubiquitination. *J Immunol*. 2019;202(10):2957-70. Epub 2019/04/07. doi:  
701 10.4049/jimmunol.1800656. PubMed PMID: 30952814.
- 702 60. Wang X, Naidu SR, Sverdrup F, Androphy EJ. Tax1BP1 interacts with papillomavirus E2  
703 and regulates E2-dependent transcription and stability. *J Virol*. 2009;83(5):2274-84. Epub  
704 2008/12/26. doi: JVI.01791-08 [pii]  
705 10.1128/JVI.01791-08. PubMed PMID: 19109394; PubMed Central PMCID: PMC2643713.
- 706 61. Petkova DS, Verlhac P, Rozieres A, Baguet J, Claviere M, Kretz-Remy C, et al. Distinct  
707 Contributions of Autophagy Receptors in Measles Virus Replication. *Viruses*. 2017;9(5). Epub  
708 2017/05/23. doi: 10.3390/v9050123. PubMed PMID: 28531150; PubMed Central PMCID:  
709 PMC5454435.
- 710 62. Sou YS, Waguri S, Iwata J, Ueno T, Fujimura T, Hara T, et al. The Atg8 conjugation  
711 system is indispensable for proper development of autophagic isolation membranes in mice. *Mol*  
712 *Biol Cell*. 2008;19(11):4762-75. Epub 2008/09/05. doi: 10.1091/mbc.E08-03-0309. PubMed  
713 PMID: 18768753; PubMed Central PMCID: PMC2575156.
- 714 63. Ng SL, Friedman BA, Schmid S, Gertz J, Myers RM, Tenover BR, et al. I $\kappa$ B kinase  
715  $\epsilon$  (IKK $\epsilon$ ) regulates the balance between type I and type II interferon responses. *Proc*

- 716 Natl Acad Sci U S A. 2011;108(52):21170-5. Epub 2011/12/16. doi: 10.1073/pnas.1119137109.  
717 PubMed PMID: 22171011; PubMed Central PMCID: PMC3248534.
- 718 64. Hemmi H, Takeuchi O, Sato S, Yamamoto M, Kaisho T, Sanjo H, et al. The roles of two  
719 IkappaB kinase-related kinases in lipopolysaccharide and double stranded RNA signaling and viral  
720 infection. *J Exp Med*. 2004;199(12):1641-50. Epub 2004/06/24. doi: 10.1084/jem.20040520.  
721 PubMed PMID: 15210742; PubMed Central PMCID: PMCPMC2212809.
- 722 65. Sanjana NE, Shalem O, Zhang F. Improved vectors and genome-wide libraries for CRISPR  
723 screening. *Nature methods*. 2014;11(8):783-4. Epub 2014/07/31. doi: 10.1038/nmeth.3047.  
724 PubMed PMID: 25075903; PubMed Central PMCID: PMCPMC4486245.
- 725 66. Choi YB, Choi Y, Harhaj EW. Peroxisomes support human herpesvirus 8 latency by  
726 stabilizing the viral oncogenic protein vFLIP via the MAVS-TRAF complex. *PLoS Pathog*.  
727 2018;14(5):e1007058. Epub 2018/05/11. doi: 10.1371/journal.ppat.1007058. PubMed PMID:  
728 29746593; PubMed Central PMCID: PMCPMC5963799.
- 729 67. Wang S, Xie F, Chu F, Zhang Z, Yang B, Dai T, et al. YAP antagonizes innate antiviral  
730 immunity and is targeted for lysosomal degradation through IKKepsilon-mediated  
731 phosphorylation. *Nat Immunol*. 2017;18(7):733-43. Epub 2017/05/10. doi: 10.1038/ni.3744.  
732 PubMed PMID: 28481329.
- 733 68. Vo MT, Smith BJ, Nicholas J, Choi YB. Activation of NIX-mediated mitophagy by an  
734 interferon regulatory factor homologue of human herpesvirus. *Nature communications*.  
735 2019;10(1):3203. Epub 2019/07/22. doi: 10.1038/s41467-019-11164-2. PubMed PMID:  
736 31324791; PubMed Central PMCID: PMCPMC6642096.
- 737

738 **Figure legends**

739 **Fig. 1 I $\kappa$ B kinases induce TAX1BP1 phosphorylation.**

740 (A) 293T cells were co-transfected with Flag-TAX1BP1 together with the indicated kinase  
741 plasmids and 24 h later lysed, and the cell extracts were immunoblotted with the indicated  
742 antibodies. (B) 293T cells were transfected with the indicated plasmids and lysates were incubated  
743 with  $\lambda$ -phosphatase for 30 min prior to immunoblotting with anti-FLAG. (C) *In vitro* kinase assays.  
744 Purified GST-tagged TAX1BP1 (300 ng) was incubated with 50 ng of purified recombinant GST-  
745 tagged IKKi or hexahistidine-tagged TBK1 in the presence or absence of ATP. The reaction  
746 mixtures were immunoblotted with antibodies to TAX1BP1, IKKi and TBK1. (D) Consensus  
747 phosphorylation sequences for IKKi found in CYLD and predicted for TAX1BP1. The conserved  
748 serine residue is highlighted in red. (E) Colloidal blue staining of *in vitro* kinase reaction mixtures  
749 containing TAX1BP1 with or without IKKi. Individual bands within the red rectangle were cut  
750 and gel extracted for mass spectrometry (MS) analysis. (F) The primary sequences of TAX1BP1.  
751 Thirteen serine and threonine residues were predicted for IKKi phosphorylation of TAX1BP1 by  
752 MS analysis and are marked by yellow circles above them. The amino acids for the main functional  
753 domains of TAX1BP1, including canonical and noncanonical LC3-interacting regions (LIRs),  
754 three coiled-coil domains, and two zinc-finger domains, are underlined.

755

756 **Fig. 2 Three phosphoserine residues are involved in TAX1BP1 degradation.**

757 (A) Schematic diagram of TAX1BP1 domains. The marked ten and thirteen predicted  
758 phosphorylation sites were substituted for alanine, generating the TAX1BP1 10A and 13A  
759 mutants, respectively. SKICH, the SKIP carboxy homology domain; LIR, LC3-interacting region;  
760 CC, coiled-coil domain; ZF, zinc finger domain. (B) Immunoblot analysis of the extracts derived

761 from 293T cells transfected with Flag-TAX1BP1 wild type (WT) and mutants (10A and 13A)  
762 together with or without Flag-IKKi. For better separation of phosphorylated TAX1BP1, a 6% gel  
763 was used. (C) Schematic of restored TAX1BP1 10A variants at single or multiple phosphorylation  
764 residue(s). (D) 293T cells transfected with Flag-TAX1BP1 WT and mutants together with HA-  
765 tagged TAX1BP1 10A for 24 h were infected with or without VSV-GFP for 6 h at an MOI of 1,  
766 and the cell extracts were immunoblotted with the indicated antibodies. (E) Immunoblot analysis  
767 of the extracts derived from 293T cells transfected with Flag-TAX1BP1 WT and variants (10A,  
768 7A, and 6A) and 24 h later infected with or without VSV-GFP as above. As shown in (C), 7A was  
769 generated by restoring the three potential phosphorylation sites, A254, A593, and A666 of 10A,  
770 and 6A was generated by restoring A250 of 7A. (F) 293T cells were co-transfected with Flag-  
771 TAX1BP1 WT and LIR mutants, W49A for mutation of the canonical LIR, V143S for mutation  
772 of the non-canonical LIR, and W49A/V143S for mutation of both the LIRs, together with or  
773 without Flag-IKKi for 24 h, and the cell extracts were immunoblotted with the indicated  
774 antibodies.

775

776 **Fig. 3 TBK1 and IKKi regulate the basal turnover of TAX1BP1.**

777 (A-D) Immunoblot analyses of the extracts derived from the following cells: two different *TBK1*  
778 knockout (KO) DLD-1 cell lines (A) and two different *IKKi* KO DLD-1 cell lines (B) transfected  
779 with 2.5 µg/ml poly(I:C) for 0, 4 and 6 h, *IKKi/TBK1* double KO (dKO) DLD-1 cells infected with  
780 VSV-GFP for 24 h at different MOIs (C), and *Ikk1<sup>-/-</sup>* and *Ikk1<sup>-/-</sup>Tbkl<sup>-/-</sup>*-MEFs infected with VSV-  
781 GFP for 20 h at an MOI of 0.1 (D). (E) TAX1BP1 expression was quantified by ImageJ using  
782 lysates from WT and *IKKi/TBK1* dKO DLD-1 cells. Data were derived from five independent



783 experiments. Unpaired Student's *t*-test, \**P* < 0.05. (F) WT and *IKKi/TBK1* dKO DLD-1 cells were  
784 treated with calyculin A for 30 min, and lysates were immunoblotted with the indicated antibodies.

785

786 **Fig. 4 IKK $\alpha$  is required for VSV-induced TAX1BP1 degradation.**

787 (A) WT and *IKKi/TBK1* dKO DLD-1 cells were treated with DMSO or 20  $\mu$ M IKK inhibitor VII  
788 for 1 h before poly(I:C) transfection. Lysates were immunoblotted with the indicated antibodies.

789 (B) *Ikk $\alpha$ <sup>-/-</sup>*, *Ikk $\beta$ <sup>-/-</sup>* and *Ikk $\gamma$ <sup>-/-</sup>* MEFs were infected with VSV-GFP for 13 h and TAX1BP1 and  
790 Actin expression were examined by immunoblotting.

791

792 **Fig. 5 TAX1BP1 is degraded by autophagy during RNA virus infection.**

793 (A) DLD-1 cells were treated with DMSO or Baf A1 prior to poly(I:C) transfection. Lysates were  
794 subjected to immunoblotting with the indicated antibodies. (B) WT and *Atg3<sup>-/-</sup>* MEFs were

795 infected with VSV-GFP at the indicated MOIs for 13 h. (C) Incucyte S3 live-cell analysis was  
796 performed with WT and *Atg3<sup>-/-</sup>* MEFs infected with VSV-GFP (MOI=0.1). (D) Immunoblot

797 analyses of the extracts derived from two different *ATG9A* KO DLD-1 cell lines (C2 and F8) and  
798 *NCOA5* KO DLD-1 cell line (C5) transfected with 2.5  $\mu$ g/ml poly(I:C) for 6 h. To facilitate the

799 detection of ATG9A protein, cell lysates were prepared by heating at 70°C for 10 min in 1x SDS  
800 sample buffer instead of boiling. (E) *ATG9A* KO DLD-1 cell line (F8) was infected with VSV-

801 GFP for 24 h at different MOIs and subjected to immunoblotting with the indicated antibodies.

802

803 **Fig. 6 Phosphorylation of TAX1BP1 is required for localization to autolysosomes.**

804 (A) Immunofluorescence assays. *TAX1BP1* KO HeLa cells were transfected with Flag-TAX1BP1

805 WT, 10A or 3SD (S254D, S593D and S666D) and 24 h later transfected with 2.5  $\mu$ g/ml poly(I:C)

806 for 6 h in the presence of 20  $\mu$ M leupeptin. Scale bar, 10  $\mu$ m. (B) Pearson's correlation coefficient  
807 was calculated to measure co-localization between TAX1BP1 and LAMP1 in 8-12 cells randomly  
808 selected from each sample. Unpaired Student's *t*-test, \*\*\**P* < 0.001, n.s.=not significant.

809

810 **Fig. 7 TAX1BP1 promotes MAVS degradation via aggrephagy.**

811 (A) Semi-denaturing detergent agarose gel electrophoresis (SDD-AGE) analysis of MAVS  
812 protein. Crude mitochondria were isolated from *Tax1bp1*<sup>+/+</sup> and *Tax1bp1*<sup>-/-</sup> MEFs infected with  
813 Sendai Virus (SeV) (25 HA units/ml) for 6 h, and extracts separated on SDD-AGE and SDS-PAGE  
814 gels and immunoblotted with the indicated antibodies. (B) 293 T cells were transfected with the  
815 indicated plasmids and lysates subjected to SDD-AGE for MAVS aggregates and SDS-PAGE to  
816 examine expression of TAX1BP1 and MAVS. (C) Dual luciferase reporter assays. 293T cells were  
817 co-transfected with V5-MAVS and Flag-TAX1BP1 WT, 10A or 3SD at a ratio of 1:8 along with  
818 interferon  $\beta$  (IFN $\beta$ ) promoter-driven firefly luciferase and thymidine kinase (TK) promoter-  
819 dependent *Renilla* luciferase reporter plasmids for 24 h. The data are presented as mean  $\pm$  standard  
820 deviation of biological triplicates. The remaining cell lysates were subjected to immunoblotting  
821 with anti-Flag, anti-V5 and anti-LDH antibodies. One-way ANOVA with Dunnett's post hoc test,  
822 \*\*\*\**P* < 0.0001, n.s.=not significant. Unpaired Student's *t*-test, \*\*, *p* < 0.01.

823

824 **Fig. S1 A kinase-dead IKKi mutant is impaired in TAX1BP1 phosphorylation.**

825 293T cells were transfected with Flag-TAX1BP1 and either Flag-IKKi or Flag-IKKi K38A.  
826 Lysates were subjected to immunoblotting with anti-Flag antibody.

827

828 **Fig. S2 Mapping of TAX1BP1 sites phosphorylated by IKKi.**

829 293T cells co-transfected with Flag-TAX1BP1 WT and variants (10A and its variants, which were  
830 rescued at the indicated residues) together with Flag-IKKi for 24 h, and the cell extracts were  
831 immunoblotted with anti-Flag antibody.

832

833 **Fig. S3 IKKi and TBK1 are not involved in virus infection-induced TAX1BP1 degradation.**

834 Two different IKKi and TBK1 double KO (dKO) DLD-1 cell lines were infected with VSV-GFP  
835 for 24 h at an MOI of 0.1, and cell extracts were immunoblotted with anti-TAX1BP1, p62 and  
836 LDH antibodies.

837

838 **Fig. S4 TAX1BP1 can interact with members of the mammalian autophagy-related gene 8**  
839 **(mATG8) family.**

840 Co-immunoprecipitation (IP) assays. 293T cells were co-transfected with each of the V5-tagged  
841 mATG8 members, including MAP1LC3A (LC3A), MAP1LC3B (LC3B), MAP1LC3C (LC3C),  
842 GABARAP, GABARAPL1 (GEC1), and GABARAPL2 (GATE16), together with Flag-  
843 TAX1BP1 and 24 h later lysed, and the lysates were subjected to IP using anti-Flag antibody-  
844 conjugated agarose (L5 beads, BioLegend). The IP complex and lysates were separated on SDS-  
845 PAGE and immunoblotted with anti-Flag or V5 antibody.

846

847 **Fig. S5 Phosphorylation does not regulate mATG8 binding of TAX1BP1.**

848 Co-immunoprecipitation (IP) assays. 293T cells were co-transfected with V5-LC3B or V5-GEC1  
849 together with Flag-TAX1BP1 WT and variants and 24 h later lysed, and the lysates were subjected  
850 to IP using anti-Flag antibody-conjugated agarose (L5 beads, BioLegend). The IP complex and  
851 lysates were separated on SDS-PAGE and immunoblotted with anti-Flag or V5 antibody.

852

853 **Fig. S6 TAX1BP1 binding to MAVS does not require its phosphorylation.**

854 Co-immunoprecipitation (IP) assays. 293T cells were co-transfected with V5-tagged MAVS  
855 together with Flag-TAX1BP1 (WT and indicated variants) and 24 h later lysed, and the lysates  
856 were subjected to IP using anti-V5 antibody-conjugated agarose. The IP complex and lysates were  
857 separated on SDS-PAGE and immunoblotted with anti-Flag or V5 antibody.

858

859 **Fig. S7 Phosphorylation does not affect TAX1BP1 dimerization.**

860 NanoBiT-based protein fragment complementation assays (PCA). NanoBiT assays were  
861 performed as previously described [68]. (A) 293T cells were co-transfected with Nano luciferase  
862 Large BiT (LgB)-fused TAX1BP1 together with Small BiT (SmB)-fused HaloTag (HT) or  
863 TAX1BP1 and 24 h later transfected with or without 2.5  $\mu\text{g/ml}$  poly(I:C) for an additional 6 h. The  
864 luminescence was measured using GloMax (Promega) after adding furimazine (Promega), a cell-  
865 permeable substrate of Nano luciferase. RLU was calculated by normalizing the data by the value  
866 of the pair of HT-SmB and LgB-TAX1BP1 (no poly(I:C) treatment). The data presented are mean  
867  $\pm$  the standard deviation (SD) of biological triplicates. Unpaired Student's *t*-test, \*\*\*,  $p < 0.001$ .  
868 (B) 293T cells were co-transfected with pairs of LgB and SmB-fused TAX1BP1 (WT, 10A and  
869 3SD) proteins and 24 h later measured for their luminescence as above. In addition, the TAX1BP1  
870 mutant lacking amino acids 321-420, which are essential for TAX1BP1 dimerization, was included  
871 as a control. The data presented are mean  $\pm$  SD of experimental triplicates.

872

873 **Fig. S8 Overexpression of IKK $\alpha$  and IKK $\beta$  promotes TAX1BP1 localization to**  
874 **autolysosomes.** *TAX1BP1* KO HeLa cells were co-transfected with Flag-TAX1BP1 WT along

875 with empty vector, IKK $\alpha$ , IKK $\beta$  or IKKi, and 24 h later immunostained with Flag and LAMP1  
876 antibodies. Leupeptin (20  $\mu$ M) was added to the cultures to prevent autophagic degradation of  
877 TAX1BP1. A representative confocal image of each sample is presented. Scale bar, 10  $\mu$ m.

**Fig. 1**

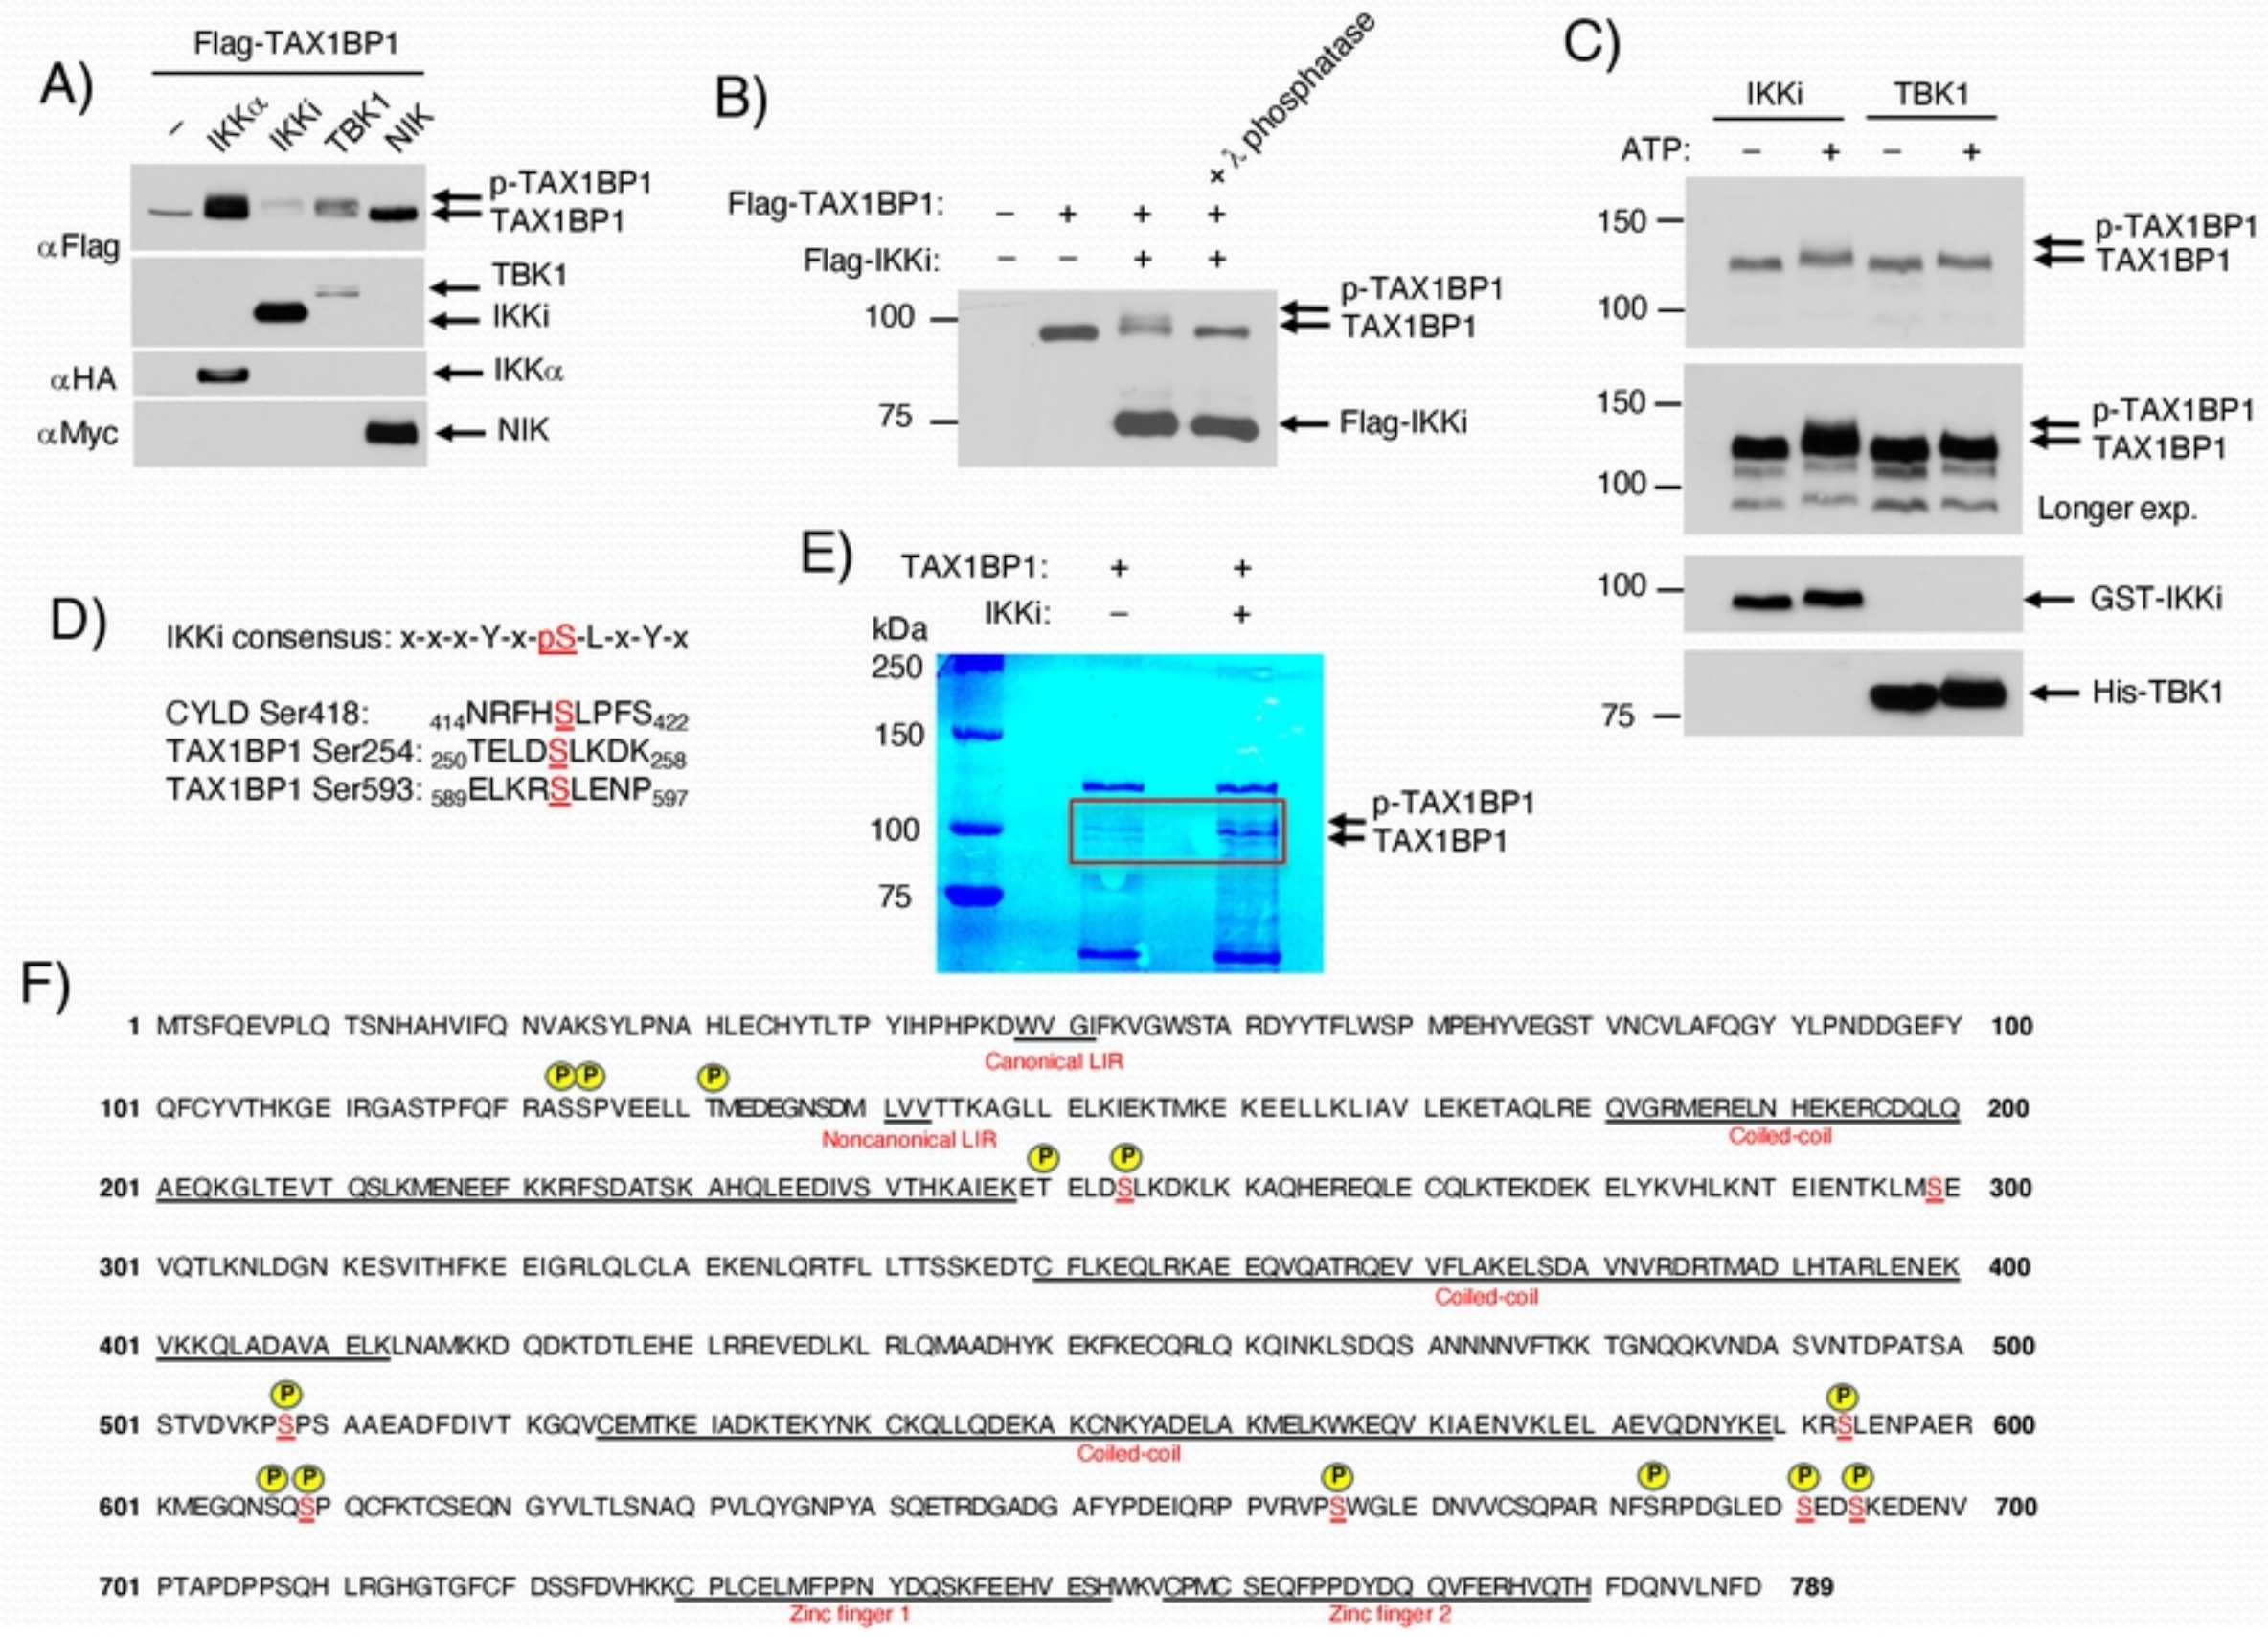

**Figure 1**

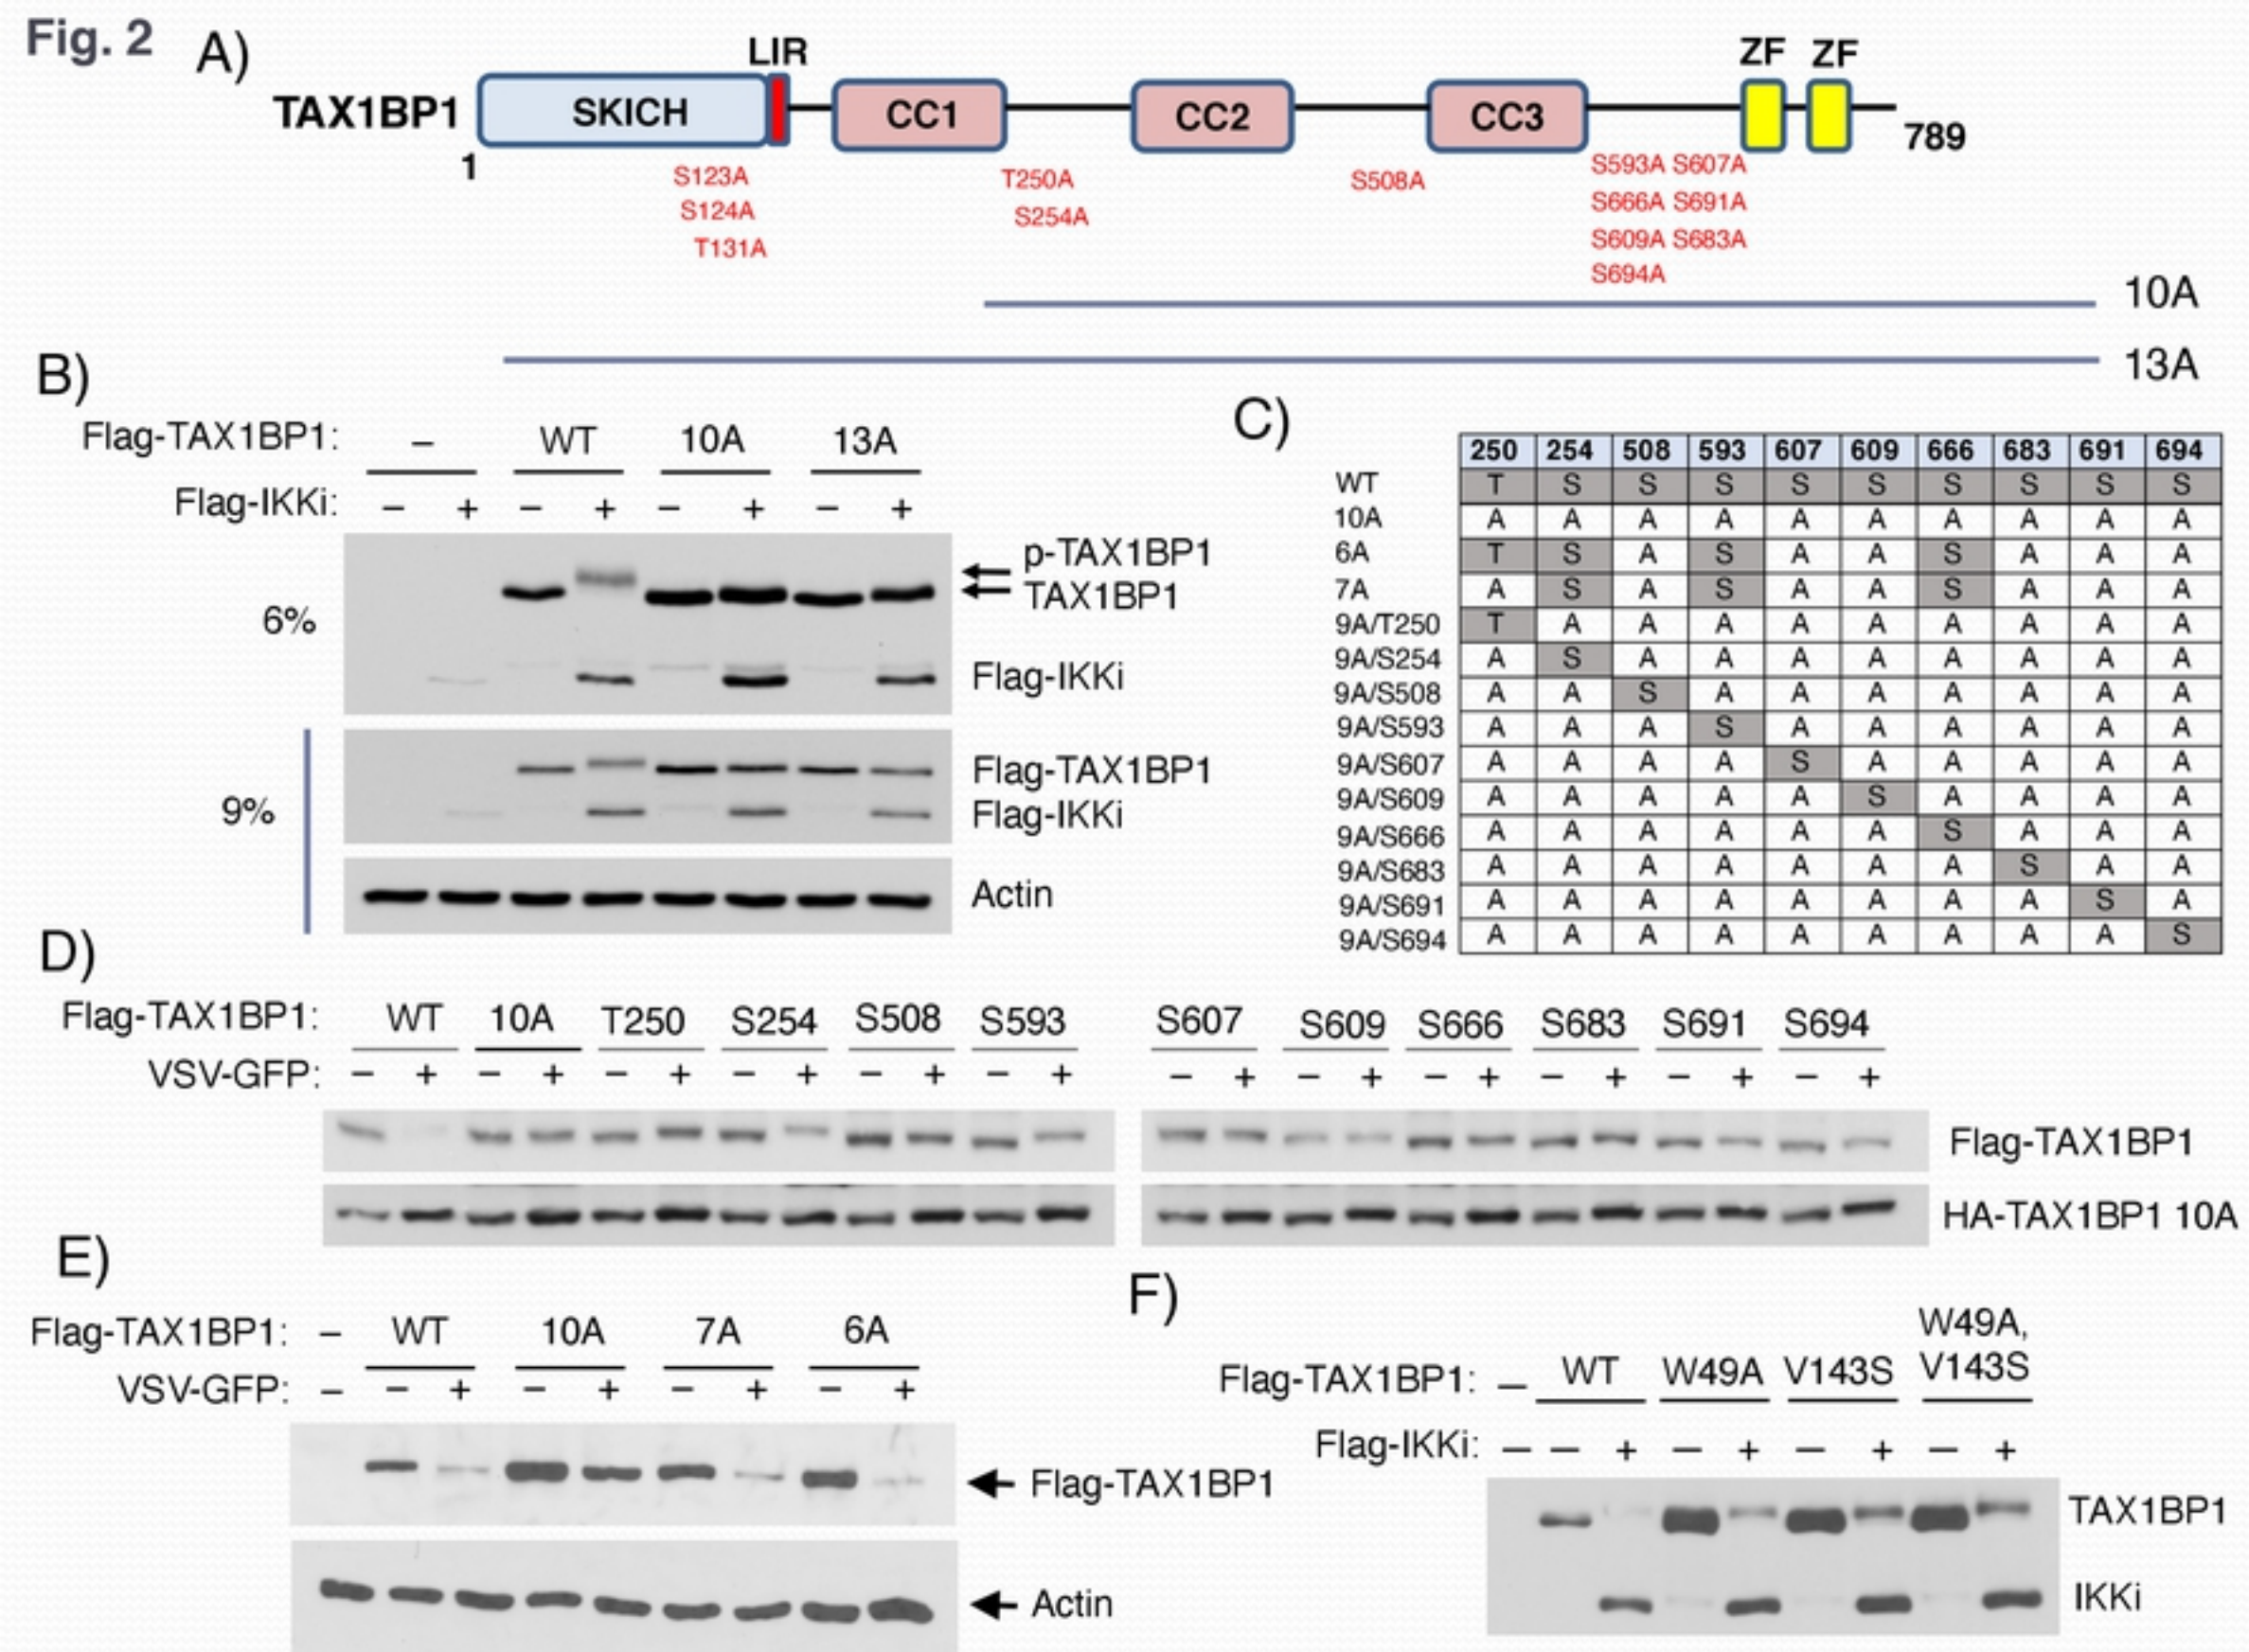

Figure 2

**Fig. 3**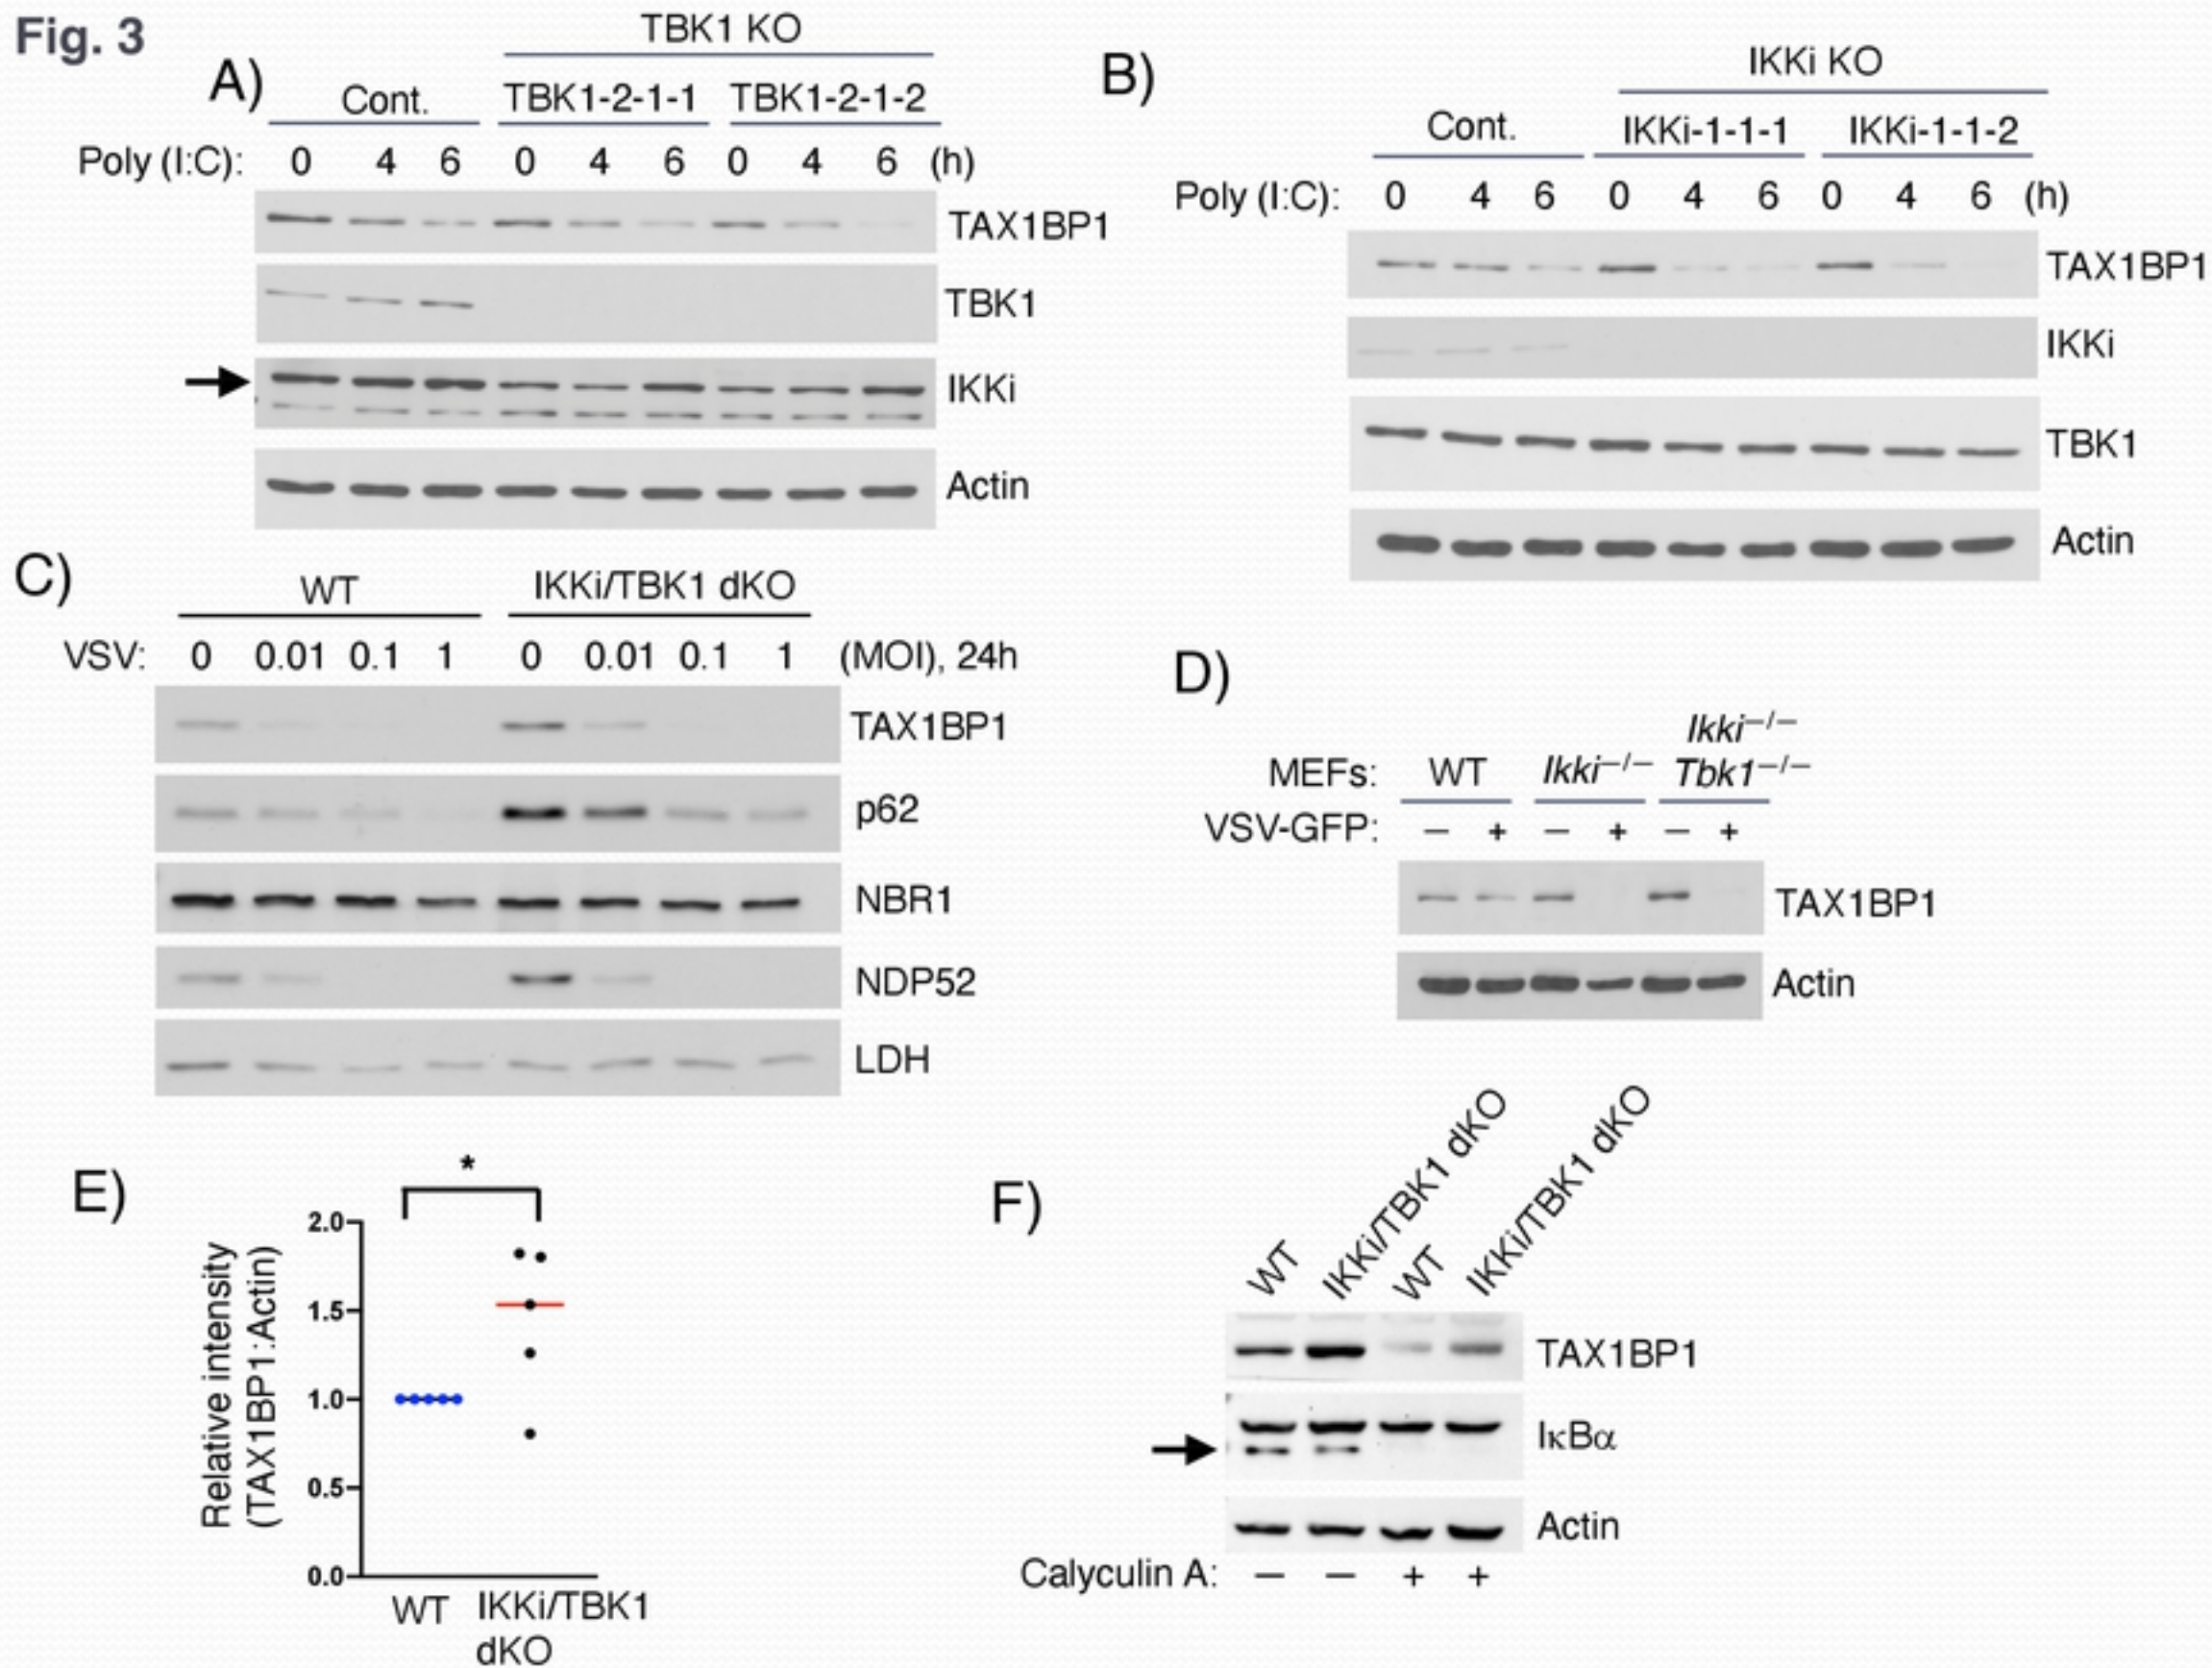**Figure 3**



Fig. 4

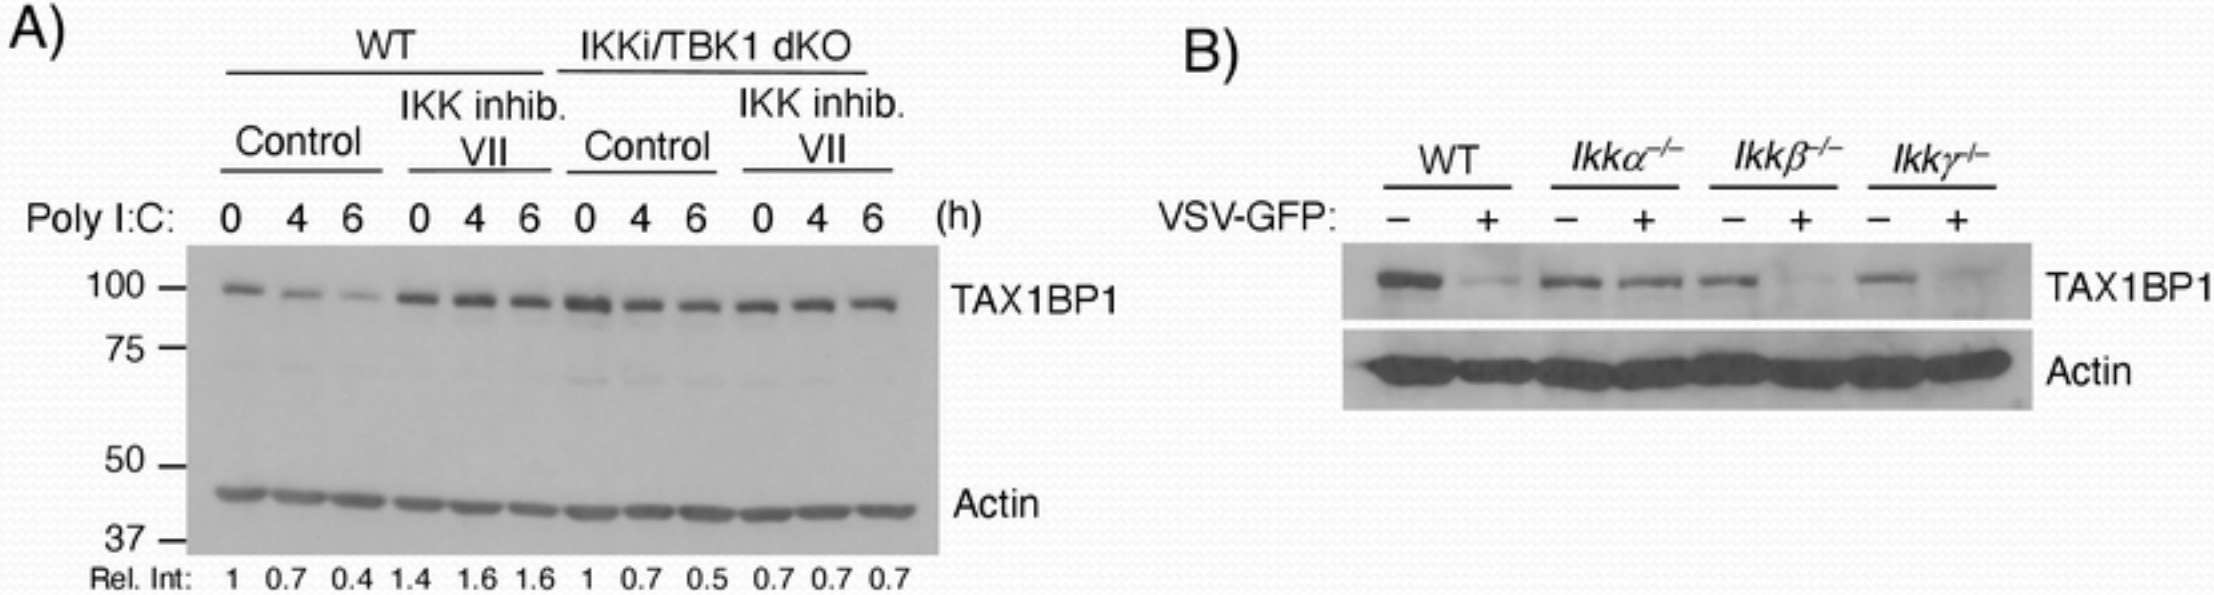

Figure 4

**Fig. 5**

**A)**

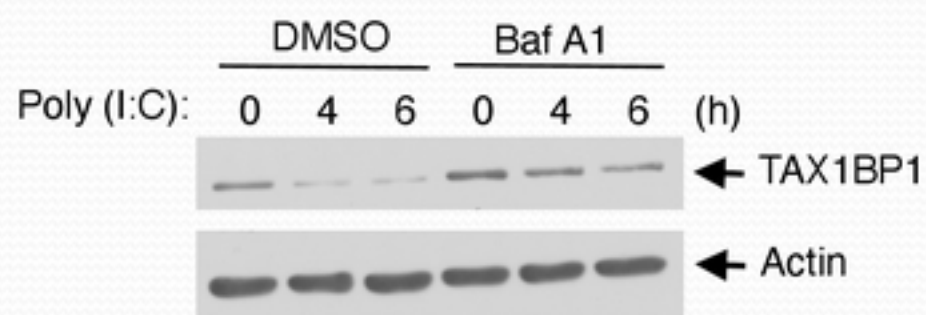

**B)**

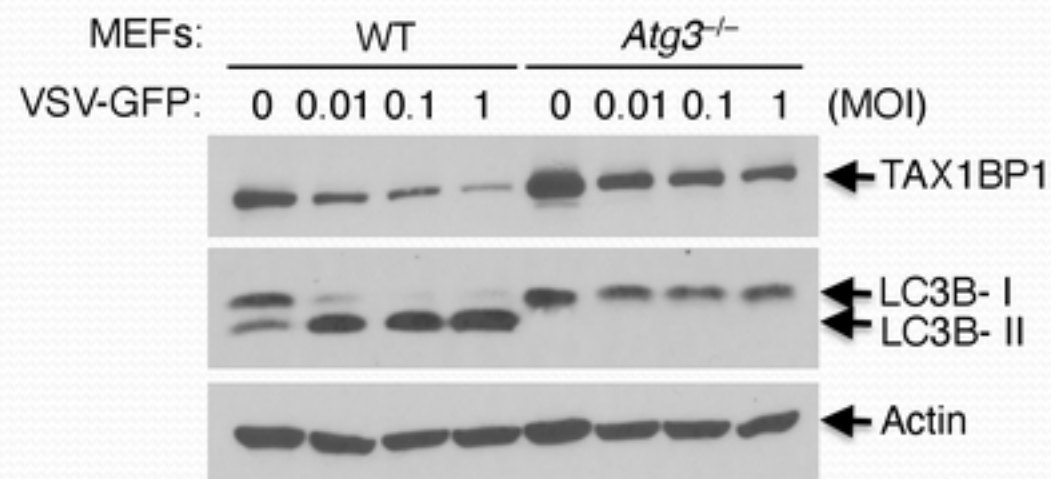

**C)**

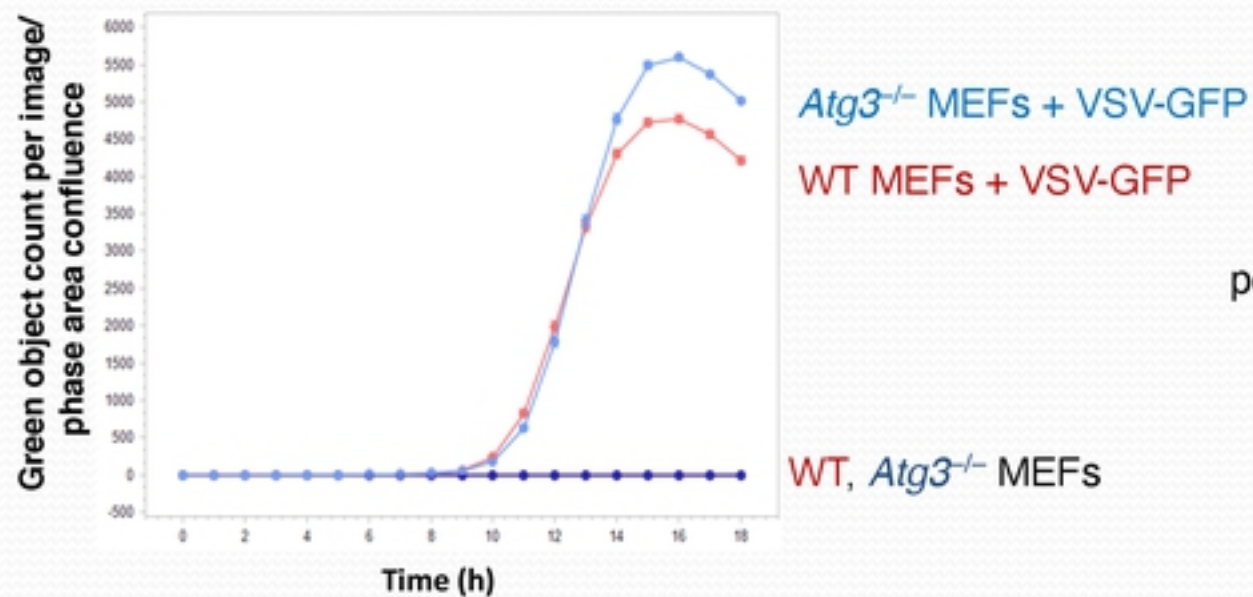

**D)**

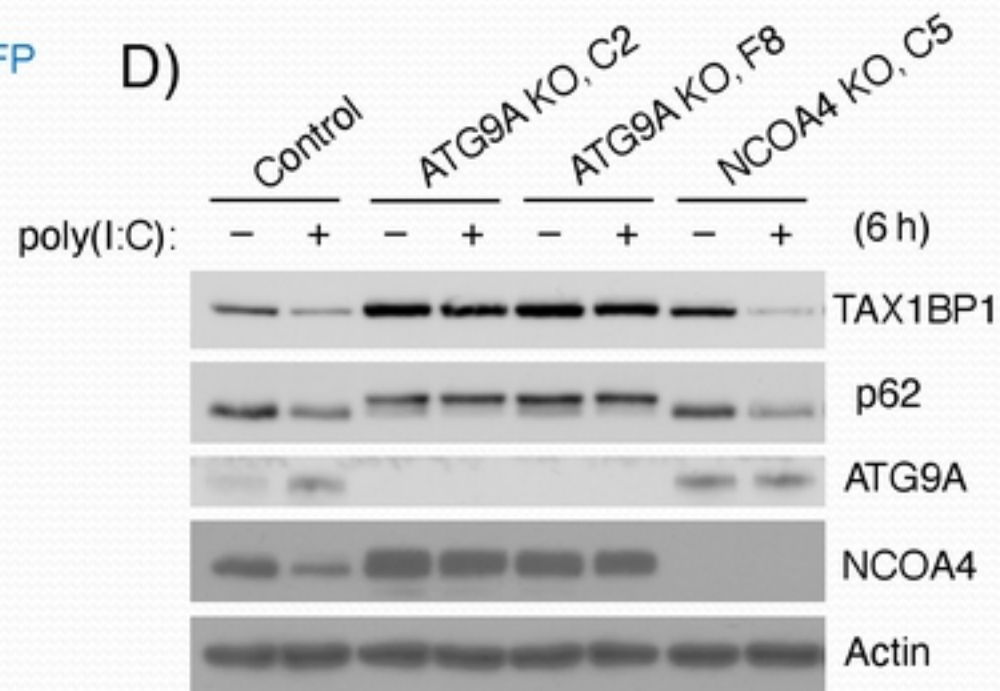

**E)**

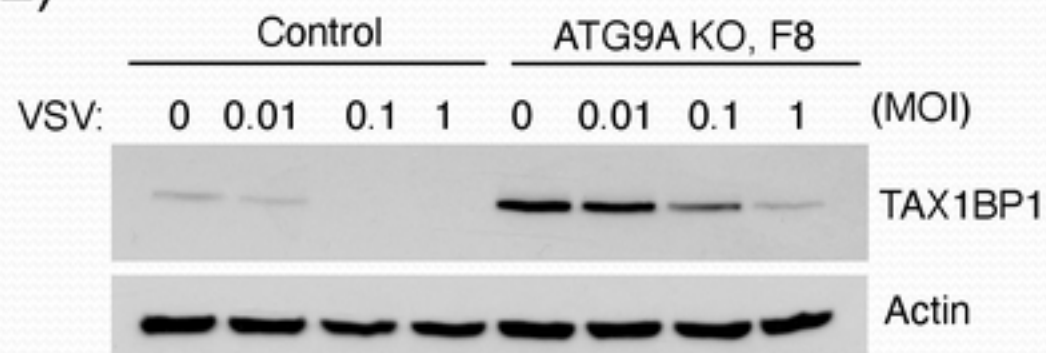

**Figure 5**

**Fig. 6**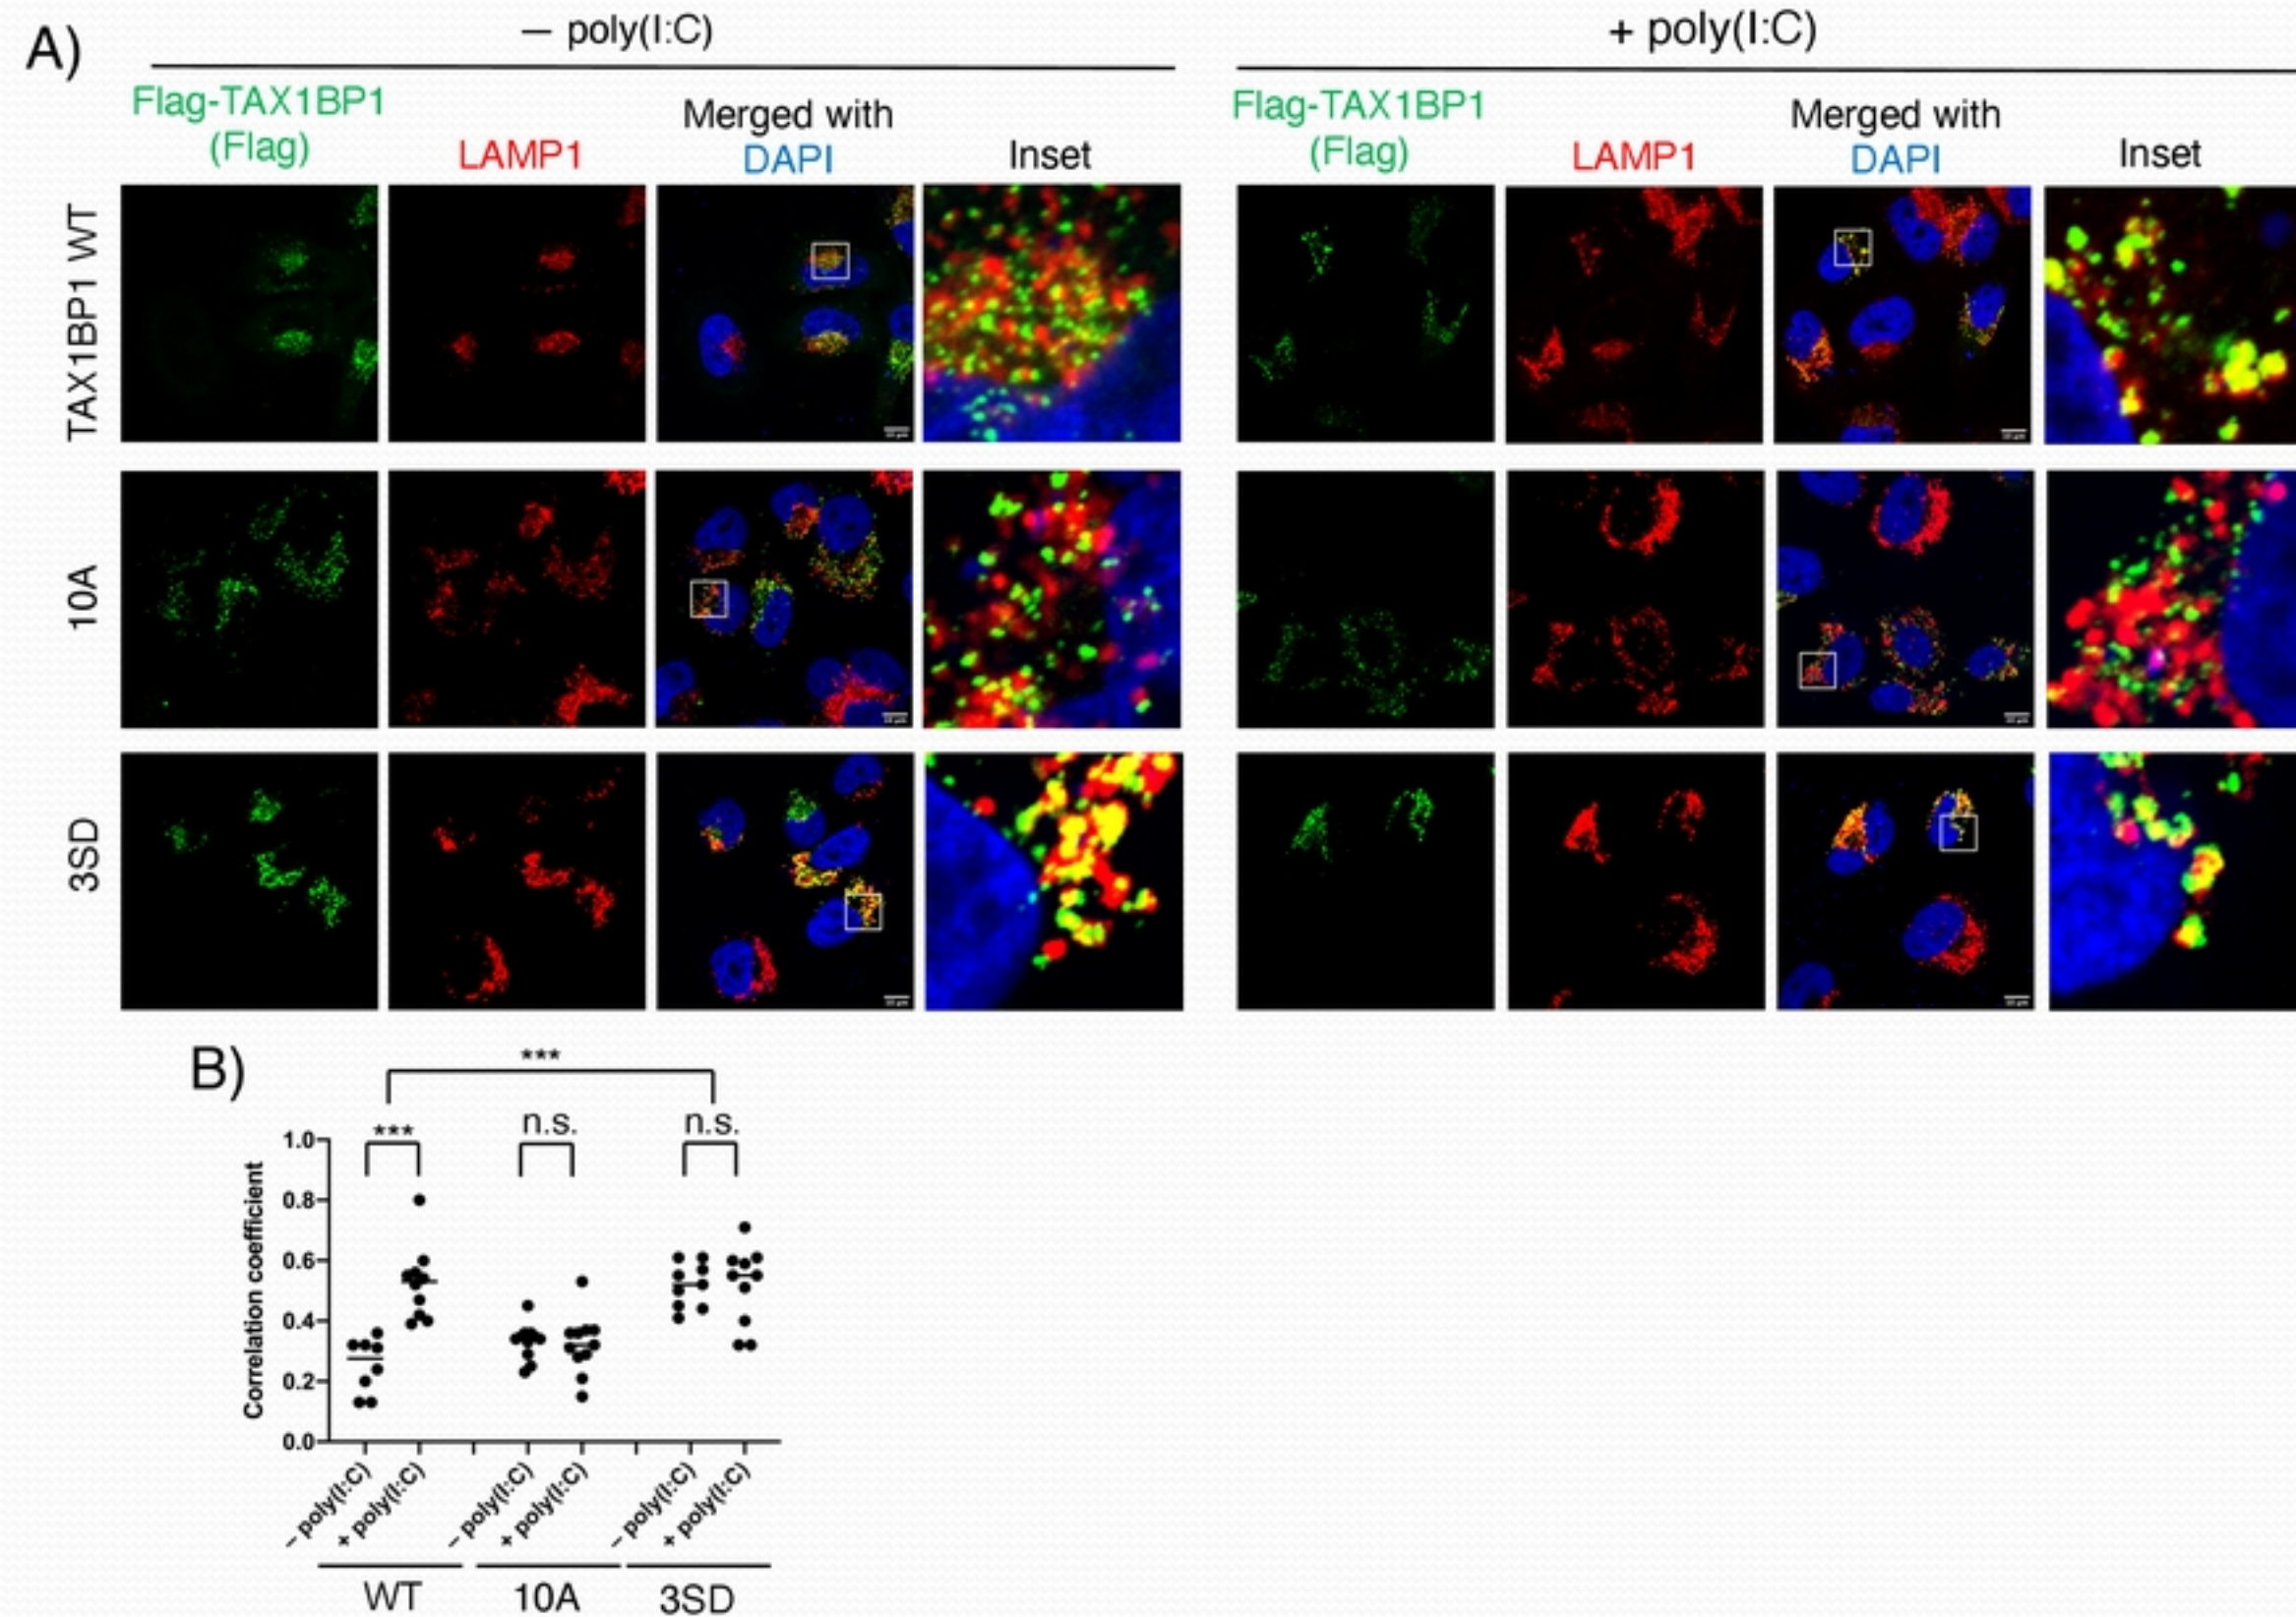**Figure 6**

Fig. 7

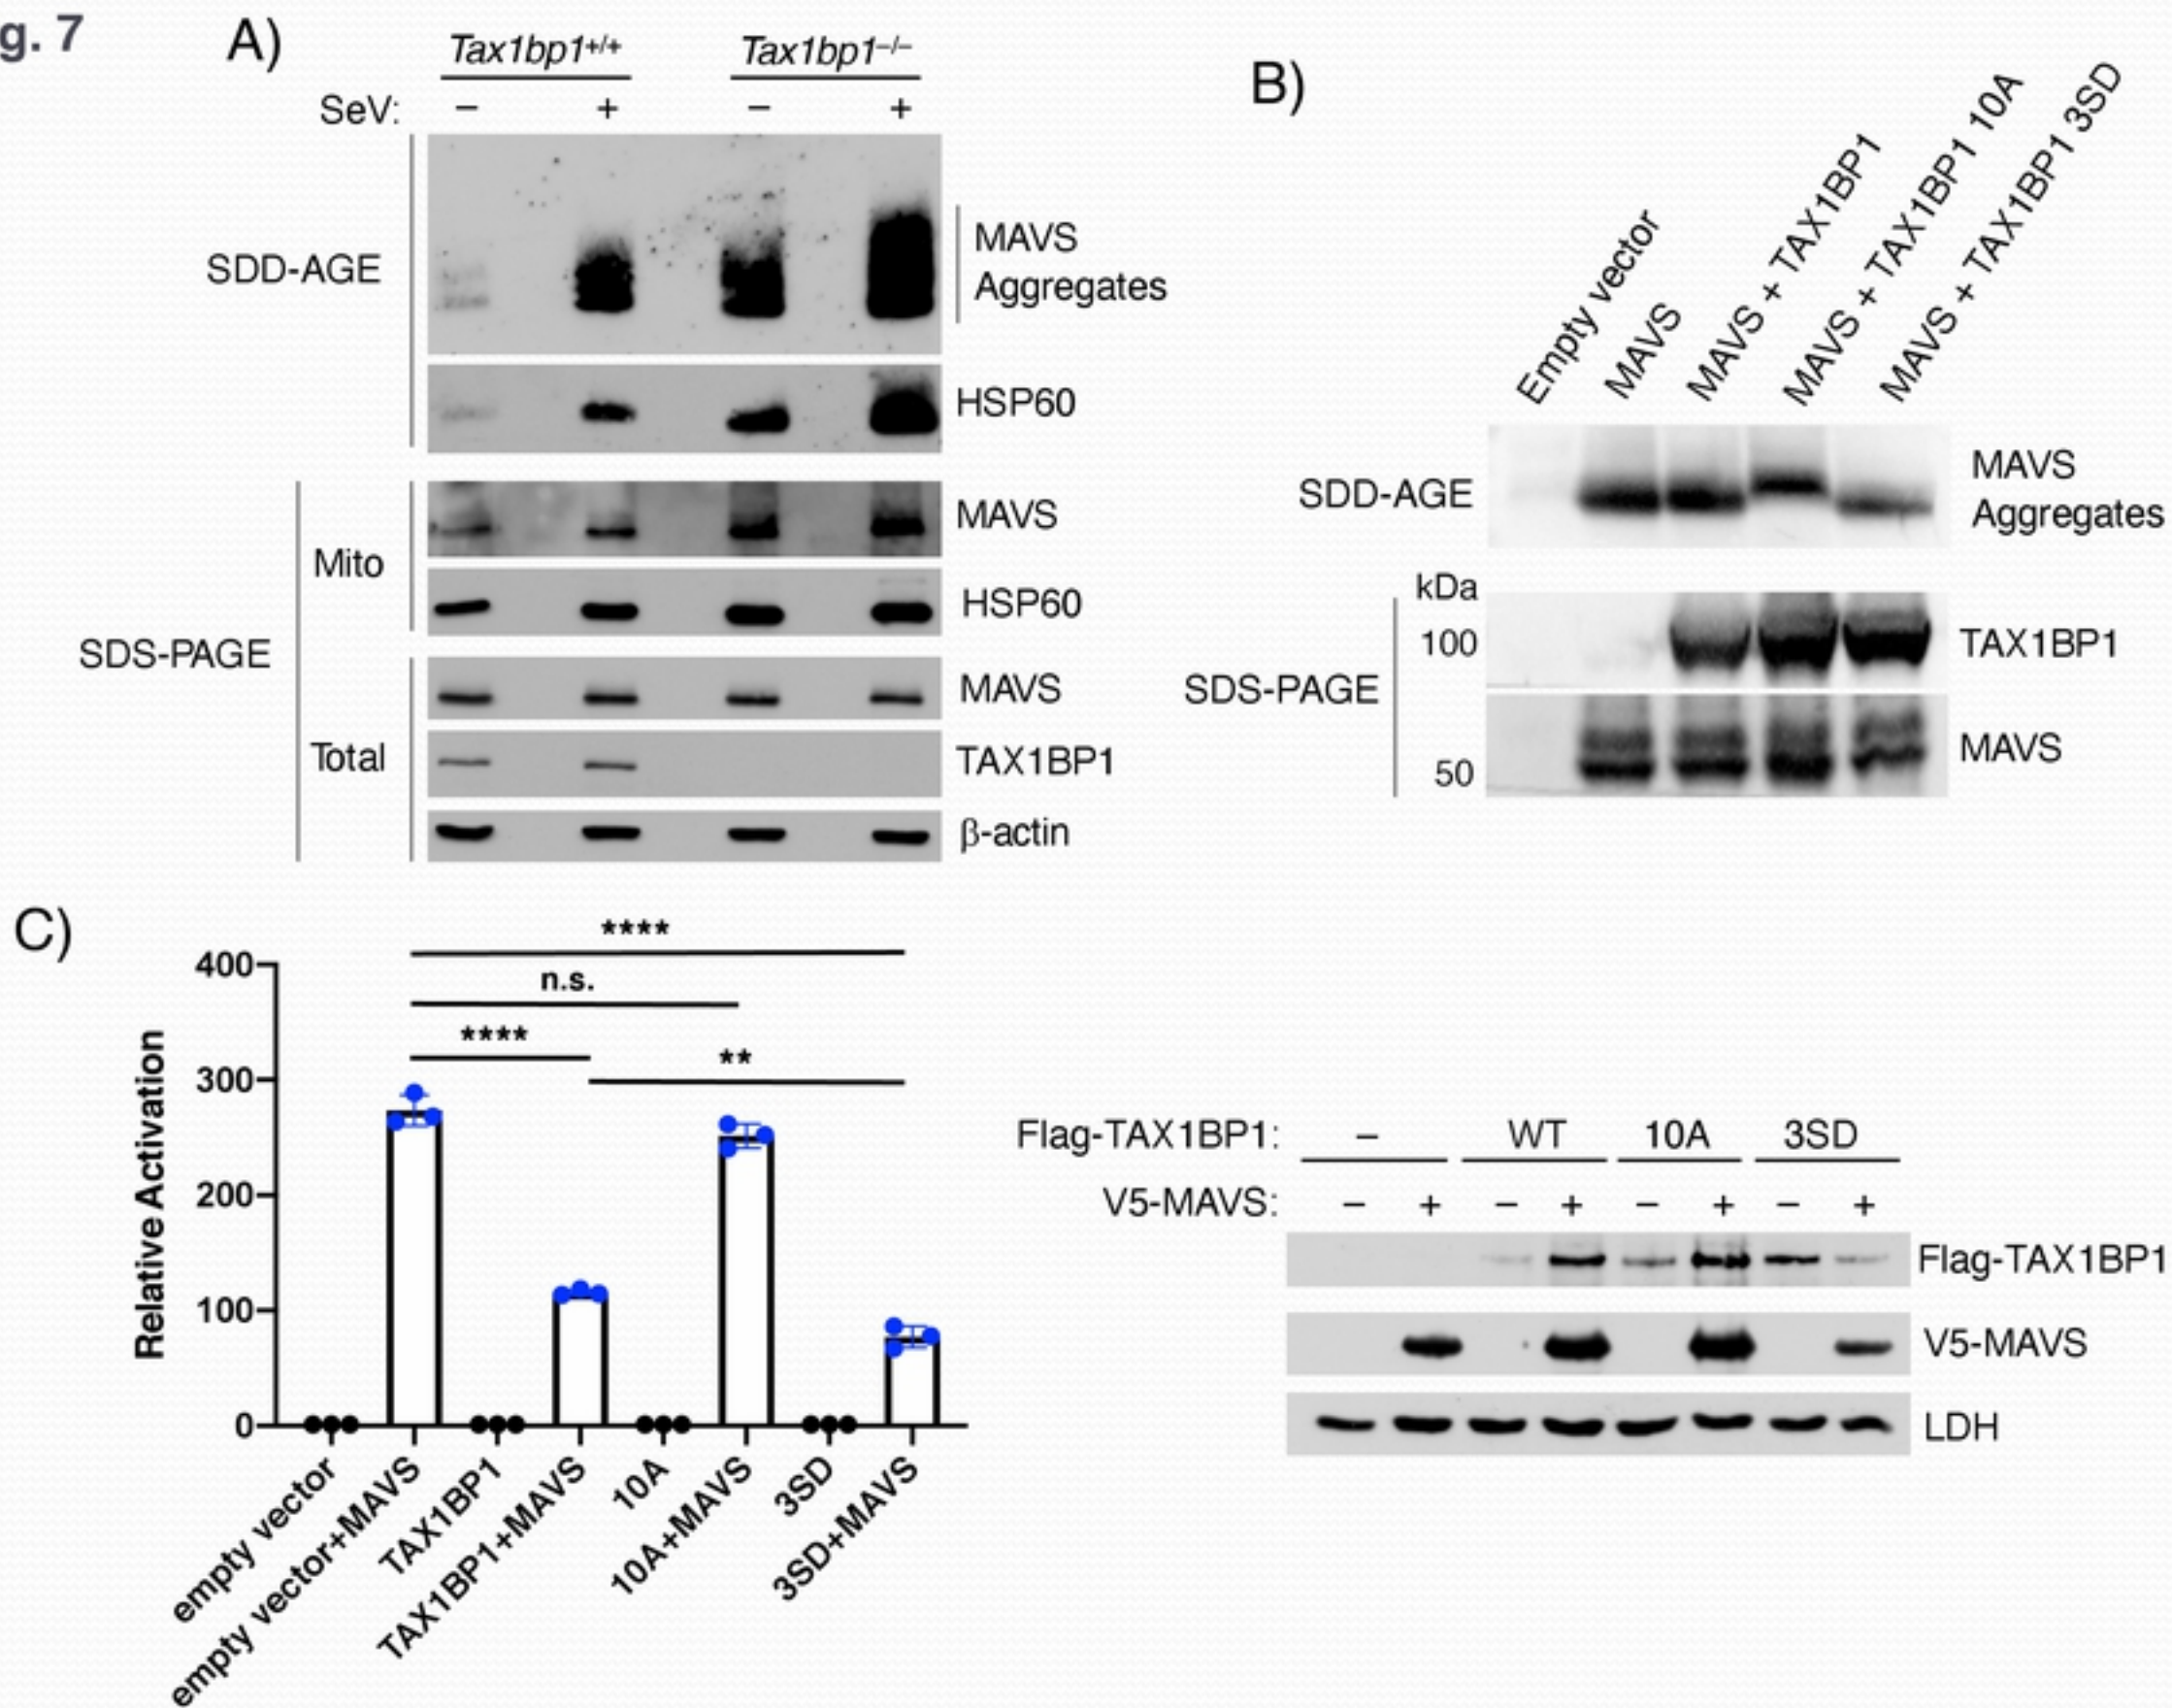

Figure 7
